1 **Arabidopsis glutathione reductase 2 is indispensable in**  
2 **plastids, while mitochondrial glutathione is safeguarded by**  
3 **additional reduction and transport systems**

4  
5 **Laurent Marty<sup>1</sup>, Daniela Bausewein<sup>1,2</sup>, Christopher Müller<sup>1</sup>, Sajid Ali Khan Bangash<sup>2</sup>, Anna**  
6 **Moseler<sup>2,\*</sup>, Markus Schwarzländer<sup>3</sup>, Stefanie J. Müller-Schüssele<sup>2</sup>, Bernd Zechmann<sup>6</sup>,**  
7 **Christophe Riondet<sup>4,5</sup>, Janneke Balk<sup>7</sup>, Markus Wirtz<sup>1</sup>, Rüdiger Hell<sup>1</sup>, Jean-Philippe Reichheld<sup>4,5</sup>**  
8 **and Andreas J. Meyer<sup>2</sup>**

9  
10 <sup>1</sup> Centre for Organismal Studies, Heidelberg University, Im Neuenheimer Feld, 360, D-69120  
11 Heidelberg, Germany

12 <sup>2</sup> Institute of Crop Science and Resource Conservation (INRES), University of Bonn, Friedrich-  
13 Ebert-Allee 144, D-53113 Bonn, Germany

14 <sup>3</sup> Institute for Biology and Biotechnology of Plants, University of Münster, Schlossplatz 8, D-  
15 48143 Münster, Germany

16 <sup>4</sup> Laboratoire Génome et Développement des Plantes, Université de Perpignan, Via Domitia, F-  
17 66860 Perpignan, France

18 <sup>5</sup> Laboratoire Génome et Développement des Plantes, CNRS, F-66860 Perpignan, France

19 <sup>6</sup> Center of Microscopy and Imaging, Baylor University, One Bear Place 97046, Waco, TX 76798-  
20 7046, USA

21 <sup>7</sup> John Innes Centre and University of East Anglia, Norwich Research Park, Norwich NR4 7UH, UK

22  
23 \*current address: Interactions Arbres/Microorganismes, UMR1136, Université de Lorraine, F-  
24 54500 Vandœuvre-lès-Nancy, France

25

26

27 **Author for correspondence:**

28 Andreas Meyer; Tel +49 228 73 60353; Email: [andreas.meyer@uni-bonn.de](mailto:andreas.meyer@uni-bonn.de).

29

## 30 **Summary**

- 31 • A highly negative glutathione redox potential ( $E_{\text{GSH}}$ ) is maintained in the cytosol, plastids and  
32 mitochondria of plant cells to support fundamental processes, including antioxidant defence,  
33 redox regulation and iron-sulfur cluster biogenesis. Out of two glutathione reductase (GR)  
34 proteins in Arabidopsis, GR2 is predicted to be dual-targeted to plastids and mitochondria, but  
35 its differential roles in these organelles remain unclear.
- 36 • We dissected the role of GR2 in organelle glutathione redox homeostasis and plant  
37 development using a combination of genetic complementation and stacked mutants,  
38 biochemical activity studies, immunogold labelling and *in vivo* biosensing.
- 39 • Our data demonstrate that GR2 is dual-targeted to plastids and mitochondria, but embryo  
40 lethality of *gr2* null mutants is caused specifically in plastids. Whereas lack of mitochondrial  
41 GR2 leads to a partially oxidised glutathione pool in the matrix, the ABC transporter ATM3 and  
42 the mitochondrial thioredoxin system provide functional backup and maintain plant viability.
- 43 • We identify GR2 as essential in the plastid stroma, where it counters GSSG accumulation and  
44 developmental arrest. By contrast a functional triad of GR2, ATM3 and the thioredoxin system  
45 in the mitochondria provides resilience to excessive glutathione oxidation.

46

47

## 48 **Key words**

49 ABCB25, dual-targeting, embryo lethality, glutathione redox status, glutathione reductase 2,  
50 mitochondria, NTR, redox-sensitive GFP

51

## 52 Introduction

53 The use of oxygen by aerobic organisms allows them to obtain more energy from carbohydrates,  
54 by accessing a larger reduction potential difference. Other metabolic reactions in the cell,  
55 however, also lead to reduction of oxygen and give rise to reactive oxygen species (ROS), such as  
56 superoxide ( $O_2^-$ ), hydrogen peroxide ( $H_2O_2$ ) and hydroxyl radicals. Low levels of ROS have been  
57 implicated in signalling between subcellular compartments as well as long-distance signalling  
58 regulating plant development and metabolism (Foyer & Noctor, 2009; Gilroy *et al.*, 2016).  
59 However, at higher concentrations ROS may oxidize lipids, proteins and DNA and render these  
60 molecules non-functional. Therefore, ROS constitute a major threat to the cell and need to be  
61 tightly controlled. Cellular compartments that can be particularly affected by oxidative stress  
62 include the plastids, mitochondria and peroxisomes (Mittler *et al.*, 2004). In chloroplasts, the  
63 Mehler reaction and antenna pigments are major sources of  $O_2^-$  formation (Asada, 1999). In  
64 mitochondria, over-reduction of the electron transport chain results in  $O_2^-$  production at  
65 complexes I and III (Moller, 2001). In both compartments,  $O_2^-$  quickly dismutates to  $H_2O_2$  and  $O_2$   
66 in a reaction catalysed by superoxide dismutase (SOD).

67 In plants,  $H_2O_2$  produced by SODs is further reduced to water by peroxidases such as ascorbate  
68 peroxidases (APXs), glutathione peroxidase-like enzymes (GPXLs) and peroxiredoxins (PRXs).  
69 While GPXLs and PRXs are dependent on thioredoxins (TRXs) as primary electron donor  
70 (Finkemeier *et al.*, 2005; Navrot *et al.*, 2006; Attacha *et al.*, 2017), APXs use electrons from  
71 ascorbate. The resulting dehydroascorbate is recycled through the ascorbate–glutathione cycle,  
72 which links  $H_2O_2$  detoxification to the redox dynamics of the glutathione redox couple.

73 Glutathione is the most abundant low-molecular weight thiol-redox buffer in all eukaryotic  
74 organisms and most Gram-negative bacteria, including cyanobacteria and purple bacteria, and is  
75 present at millimolar concentrations (Fahey, 2001; Meyer *et al.*, 2001). After synthesis in plastids  
76 and the cytosol (Pasternak *et al.*, 2008; Maughan *et al.*, 2010), reduced glutathione (GSH) is  
77 transported throughout the cell to fulfil a broad range of functions in metabolism and  
78 detoxification of xenobiotics and  $H_2O_2$  (Meyer, 2008). Upon oxidation, two molecules of GSH  
79 convert to glutathione disulfide (GSSG). In the cytosol, mitochondria and plastids the glutathione  
80 redox potential ( $E_{GSH}$ ) is highly reduced with only nanomolar concentrations of GSSG present

81 under non-stress conditions (Meyer *et al.*, 2007; Schwarzländer *et al.*, 2008). Such a high  
82 GSH/GSSG ratio is believed to be maintained by NADPH-dependent glutathione reductases (GRs).  
83 In contrast to bacteria, animals and yeast, plant genomes encode two GRs (Xu *et al.*, 2013). In  
84 Arabidopsis, GR1 is present in the cytosol, the nucleus and peroxisomes (Reumann *et al.*, 2007;  
85 Marty *et al.*, 2009; Delorme-Hinoux *et al.*, 2016). The second isoform, GR2, is dual-targeted to  
86 mitochondria and plastids (Creissen *et al.*, 1995; Chew *et al.*, 2003), as supported by proteomics  
87 analyses of purified organelles (Ito *et al.*, 2006; Peltier *et al.*, 2006). However, Yu and colleagues  
88 found no evidence for mitochondrial targeting of full-length GR2-YFP constructs and concluded  
89 exclusive plastidic localization (Yu *et al.*, 2013). While we found that Arabidopsis mutants lacking  
90 cytosolic GR1 are fully viable (Marty *et al.*, 2009), a deletion mutant lacking functional GR2 is  
91 embryo lethal (Tzafrir *et al.*, 2004; Bryant *et al.*, 2011). These observations raise important  
92 questions about the exact localization of GR2, the cause of lethality in *gr2* mutants, and about  
93 the mechanisms maintaining a highly negative glutathione redox potential ( $E_{\text{GSH}}$ ) in plastids and  
94 mitochondria.

95 Viability of Arabidopsis mutants lacking cytosolic GR1 is maintained by the NADPH-dependent  
96 TRX system (NTS) (Marty *et al.*, 2009). In this case, electrons supplied by NADPH are transferred  
97 to GSSG via NADPH-dependent TRX reductase (NTR) and TRX. Arabidopsis contains two NTRs,  
98 NTRA and NTRB, which are both targeted to the cytosol, the nucleus and mitochondria (Reichheld  
99 *et al.*, 2005; Marchal *et al.*, 2014). In addition, plastids contain a remotely related bifunctional  
100 NTR, NTRC, which contains its own TRX domain (Serrato *et al.*, 2004). NTRC has been shown to  
101 be responsible for transferring electrons from NADPH to 2-Cys PRX for  $\text{H}_2\text{O}_2$  detoxification (Perez-  
102 Ruiz *et al.*, 2017) and for redox regulation of ADP-glucose pyrophosphorylase (Michalska *et al.*,  
103 2009). While NTRC may be active in the dark and in heterotrophic tissues, classical non-fused  
104 plastidic TRXs are reduced by electrons from the photosynthetic electron transport chain via  
105 ferredoxin-dependent TRX reductase (FTR) which implies that they exercise their reductive  
106 capacity only in the light (Buchanan & Balmer, 2005). Whether and to what extent the different  
107 subcellular TRX systems contribute to organellar glutathione redox homeostasis is yet unknown.  
108 Beyond maintenance of a highly negative  $E_{\text{GSH}}$  through continuous reduction of GSSG, ATP-driven  
109 sequestration of GSSG to the vacuole by ATP-binding cassette (ABC)-transporters has been

110 shown to provide an overflow valve for high cytosolic GSSG amounts in yeast (Morgan *et al.*,  
111 2013). Similarly, the ABC-transporter of the mitochondria Atm1 in yeast and its functional  
112 homologue ATM3 in Arabidopsis (systematic name ABCB25) transport GSSG, but not GSH, driven  
113 by ATP hydrolysis (Schaedler *et al.*, 2014). The ATPase domain of Atm1 is orientated towards the  
114 mitochondrial matrix (Leighton & Schatz, 1995), indicating that these proteins export GSSG out  
115 of the mitochondria. In support of this, Arabidopsis *atm3* mutants were shown to have a more  
116 oxidized  $E_{GSH}$  in the mitochondrial matrix compared to wild type (Schaedler *et al.* 2014). However,  
117 the primary substrate of Atm1/ATM3 is thought to be GSH-bound persulfide for the biosynthesis  
118 of cytosolic iron-sulfur clusters (Kispal *et al.*, 1999; Srinivasan *et al.*, 2014). This raises the question  
119 of the ATM3's relative contribution to other systems in GSSG clearance of the mitochondrial  
120 matrix.

121 Here, we address the role of GR2 in glutathione redox homeostasis in mitochondria and plastids.  
122 We localize GR2 by immunogold labelling and complement the lethal *gr2* null mutant in a  
123 compartment-specific manner. Those analyses provide clear evidence for dual localization of GR2  
124 and for an essential role in plastids only. To address the question of why mitochondria are less  
125 affected than plastids by the lack of GR2, we focussed our attention on other possible  
126 mechanisms involved in the maintaining the  $E_{GSH}$  in the matrix. Using a series of physiological and  
127 genetic analyses we identify the involvement of alternative GSSG reduction systems and of GSSG  
128 export in  $E_{GSH}$  maintenance in the mitochondrial matrix.

129

130

## 131 **Materials and Methods**

132 The following procedures are described in **Supporting Information Methods S1** and **S2**:

133 Antibody production and gel blot analysis; Immunogold labelling and electron microscopy.

134 Primers used in this work are given in **Supporting Information Table S1**.

135

### 136 **Plant material and growth conditions**

137 The study was conducted with *Arabidopsis thaliana* ecotype Columbia-0 ([L.] Heynh.) as the wild-  
138 type (WT) control and the mutants *gr2-1* (SALK\_040170, (Alonso *et al.*, 2003), *emb2360-1* (Tzafirir

139 *et al.*, 2004), *ntra ntrb* (Reichheld *et al.*, 2007), *rml1* (Vernoux *et al.*, 2000) and *gsh1-1* (Cairns *et*  
140 *al.*, 2006), *gr1-1* (Marty *et al.*, 2009), and *atm3-4* (Bernard *et al.*, 2009), all generated in the Col-  
141 0 background. Plants were grown under short day conditions: 8 h light at 22 °C and 16 h dark at  
142 19 °C and light intensity was set to 120  $\mu\text{mol photons m}^{-2} \text{s}^{-1}$ . To induce flowering, plants were  
143 transferred to long day conditions: 16 h light at 22 °C and 8 h dark at 19 °C, light intensity was  
144 160  $\mu\text{mol photons m}^{-2} \text{s}^{-1}$ .

145 To genotype WT and mutant plants, genomic DNA was extracted from the leaf tissue according  
146 to Edwards *et al.* (1991).

147 Seeds produced by a double heterozygous *gr2-1 rml1* plant were plated on phytigel as described  
148 before (Meyer & Fricker, 2000). For rescue experiments, the growth medium was supplemented  
149 with filter-sterilized GSH (Sigma-Aldrich) to a final concentration of 1 mM before gelling.  
150 Seedlings exhibiting a characteristic *rml1* phenotype after germination were transferred to GSH  
151 plates and further development was monitored for 12 d.

152

### 153 **Cloning and plant transformation**

154 Standard molecular biology technologies like growth of bacteria, plasmid isolation and  
155 polymerase chain reaction (PCR) were applied according to (Sambrook *et al.*, 1989). For cloning,  
156 all DNA fragments were amplified by PCR and blunt-end subcloned into pCAP (Roche Applied  
157 Science, Mannheim, Germany) with primers listed in Table S1. Accuracy of the cloned fragment  
158 was verified by sequencing by SeqLab (Göttingen, Germany). Different signal peptides were  
159 ligated into the pBinAR vector (Höfgen & Willmitzer, 1990) to achieve compartment-specific  
160 complementation. The transketolase targeting peptide (TK<sub>TP</sub>) sequence was cloned into pBinAR  
161 as described before (Wirtz & Hell, 2003). Similarly, the serine hydroxymethyltransferase target  
162 peptide (SHMT<sub>TP</sub>) was amplified and cloned behind the 35S promoter of pBinAR using *KpnI* and  
163 *BamHI*. To verify targeting, both signal peptides were also fused to the N-terminus of roGFP. For  
164 compartment-specific complementation the GR2 sequence without its endogenous target  
165 peptide of 77 amino acids (aa) consistently determined by ChloroP 1.1  
166 (<http://www.cbs.dtu.dk/services/ChloroP/>) and SignalP 3.0  
167 (<http://www.cbs.dtu.dk/services/SignalP/>) (Bendtsen *et al.*, 2004) was amplified from cDNA.

168 Since the *gr2-1* mutants carried kanamycin resistance the constructs were transferred to the  
169 Basta® resistance vector pBarA (a gift from Sabine Zachgo) using *Hind*III and *Eco*RI restriction  
170 sites. For constructs with the endogenous GR2 promoter, 2.1 kb were amplified from genomic  
171 DNA and used to replace the 35S promoter in pBinAR with *Eco*RI and *Kpn*I.

172 Plant transformation was carried out by floral dip (Clough and Bent, 1998). For selection of  
173 positive transformants two-week-old plants were sprayed with Basta® (200 mg l<sup>-1</sup> glufosinate  
174 ammonium, Bayer Crop Science).

175 Arabidopsis plants were transformed with the vector pBinAR-SHMT-roGFP2-Grx1 as described  
176 earlier (Albrecht *et al.*, 2014). For both WT and plastid-complemented *gr2* mutants, lines with  
177 incomplete mitochondrial targeting of roGFP2-Grx1 were selected.

178

#### 179 **Protein purification and mitochondrial isolation**

180 For recombinant protein expression, the pET28a and pETG10a constructs were transformed in  
181 *E. coli* HMS174 cells. Cells were grown at 37 °C to an OD600 nm of 0.8 in selective media  
182 containing 50 µg ml<sup>-1</sup> kanamycin for pET28a or 100 µg ml<sup>-1</sup> ampicillin for pETG10a. Protein  
183 purification was performed as reported before (Marty *et al.*, 2009). Mitochondria were isolated  
184 from 13- to 16-day-old hydroponic Arabidopsis seedling cultures as described previously  
185 (Sweetlove *et al.*, 2007).

186

#### 187 **HPLC measurement of low-molecular weight thiols**

188 Leaf material was harvested from six-week-old plants grown on soil under short-day conditions.  
189 Leaf tissue was snap frozen in liquid nitrogen, ground to fine powder and extracted. Extraction,  
190 derivatisation and quantification of low-molecular weight thiols by HPLC were done as described  
191 before (Meyer *et al.*, 2007).

192

#### 193 **Analysis of embryo development and pollen viability**

194 Embryos, ovules or whole siliques were destained with Hoyer's solution (7.5 g gum arabic, 100 g  
195 chloral hydrate, 5 ml glycerol, 60 ml water) for at least 4 h. The embryos were analysed by  
196 differential interference contrast (DIC) microscopy with a Leica DM/RB microscope equipped

197 with a DFC 320 camera (Leica Microsystems). Pollen from mature flowers were stained according  
198 to Alexander (1969) and analysed by bright field microscopy.

199

## 200 **Chlorophyll fluorescence measurement**

201 Chlorophyll fluorescence was recorded after dark adaptation for at least 30 min with a pulse-  
202 amplitude modulated (PAM) fluorimeter (Junior PAM, Walz, Effeltrich, Germany).  $F_v/F_m$  was  
203 calculated as a measure of the maximum potential quantum yield of photosystem II.

204

## 205 **Confocal laser scanning microscopy**

206 Whole leaves of 3-week old Arabidopsis plants were placed in water on a slide and covered with  
207 a coverslip. Leaves were imaged on Zeiss confocal microscopes LSM510META or LSM780 (Carl  
208 Zeiss MicroImaging, Jena, Germany) equipped with lasers for 405- and 488-nm excitation. Images  
209 were collected with either a 25x lens (Plan-Neofluar 25x/0.8 Imm corr, Zeiss) or a 63x lens (C  
210 Apochromat 63x/1.2 W corr, Zeiss). For localization studies GFP was excited at 488 nm and  
211 emission was collected with a 505-530 nm band-pass filter. Chlorophyll autofluorescence was  
212 excited at 405 nm and recorded above 630 nm. For counterstaining mitochondria leaf tissue was  
213 incubated with 1  $\mu$ M tetramethylrhodamine methyl ester (TMRM) for 30-60 min. TMRM was  
214 excited at 543 nm and recorded at 582-646 nm. For glutathione labelling in roots of Arabidopsis  
215 seedlings intact seedlings were incubated with 100  $\mu$ M monochlorobimane (MCB) and 50  $\mu$ M  
216 propidium iodide (PI) for 30 min and imaged as reported earlier (Meyer *et al.*, 2001). For  
217 ratiometric imaging of  $E_{GSH}$  roGFP2-Grx1 was excited in multi-track mode with line switching  
218 between 488 nm illumination and 405 nm illumination. The roGFP2 fluorescence was collected  
219 with a 505–550 nm emission band-pass filter. Ratiometric image analysis was done as reported  
220 previously (Schwarzländer *et al.*, 2008) using a custom Matlab programme (Fricker, 2016).

221

222

## 223 **Results**

### 224 ***gr2* T-DNA insertion allele causes early embryonic lethality**



225 To investigate the role of GR2 for glutathione redox homeostasis, T-DNA insertion lines for *GR2*  
226 were identified and characterized. The T-DNA insertion lines *emb2360-1*, *emb2360-2*, *emb2360-*  
227 *3* (Tzafrir *et al.*, 2004), and *gr2-1* (SALK\_040170) were obtained from NASC. The T-DNA insertion  
228 in *gr2-1* was localized in the 8<sup>th</sup> intron (Fig. 1a) and the insertion site was confirmed by sequencing  
229 using a T-DNA left border primer. A population of 133 plants derived from a heterozygous *gr2-1*  
230 plant segregated with 85 kanamycin-resistant (Kan<sup>R</sup>) : 48 kanamycin-sensitive plants. This  
231 segregation of the antibiotic resistance in a 2:1 ratio ( $\chi^2 = 0.45$ ,  $P = 0.79$ ) indicates that  
232 homozygous *gr2-1* segregates as a single locus and is sporophytic lethal. Genotyping of soil-  
233 grown Kan<sup>R</sup> plants confirmed that all Kan<sup>R</sup> plants were heterozygous *gr2-1*, demonstrating that  
234 Kan<sup>R</sup> is caused by the T-DNA in the *GR2* locus. Microscopic examination of immature siliques of  
235 heterozygous *gr2-1* mutants showed that 25 % (31:97,  $\chi^2 = 0.04$  for a 1:3 segregation,  $P = 0.98$ )  
236 seeds were white with embryos arrested at globular stage of development (Fig. 1d,e). Consistent  
237 segregation patterns and phenotypes were found for the three *emb2360* alleles  
238 ([http://seedgenes.org/SeedGeneProfile\\_geneSymbol\\_EMB\\_2360.html](http://seedgenes.org/SeedGeneProfile_geneSymbol_EMB_2360.html)), providing independent  
239 evidence for a link between GR2 function and embryonic lethality. All further experiments were  
240 done with *gr2-1*, which is from now referred to as *gr2*.

241  
242 **GR2 solely targeted to plastids rescues the lethal *gr2* phenotype**  
243 With the precedence of contradicting results regarding the subcellular localization of GR2 (Chew  
244 *et al.*, 2003; Yu *et al.*, 2013) we attempted an orthogonal method to explore localization and  
245 raised polyclonal antibodies against GR2 (Fig. S2b). Immunogold labelling of GR2 in leaf tissue of  
246 WT plants independently demonstrates its dual localization (Fig. 2a,d). The early embryonic lethal  
247 phenotype of *gr2* may thus be caused by mitochondrial or plastidic defects, or both. To resolve  
248 this, *gr2* mutants were complemented with organelle-specific *GR2* constructs. The endogenous  
249 signal peptide of 77 aa was replaced by the signal peptides SHMT for mitochondria or TK<sub>TP</sub> for  
250 plastids (Schwarzländer *et al.*, 2008; Albrecht *et al.*, 2014) (Fig. S1).  
251 Compartment-specific complementation of *gr2* was initially done with GR2 constructs driven by  
252 the *CaMV 35S* promoter (*35S<sub>pro</sub>*) (Fig. S1). T2 transformants (named *pc* for plastid  
253 complementation) were selected with Basta<sup>®</sup> and genotyped for the *gr2* locus to screen for

254 successful complementation of the lethal phenotype. Transformation with *35S<sub>pro</sub>:TK<sub>TP</sub>-Δ<sub>1-77</sub>GR2*  
255 resulted in 22 % of the progeny being homozygous for *gr2* consistent with the theoretical value  
256 of 25 % rescued homozygous mutants (Table S2). From these complemented mutants three  
257 independent lines, named *pc-1*, *pc-2*, and *pc-3*, were selected and characterized in more detail  
258 (Fig. S2). Protein gel blots of WT leaf extracts consistently revealed two distinct protein bands of  
259 ~53 and ~110 kDa (Fig. S2b). The 110 kDa protein band was less intense than the 53 kDa band  
260 and most likely represents a GR2 homodimer. The unprocessed WT GR2 protein including the  
261 endogenous signal peptide of 77 aa has a predicted size of 61 kDa. The 53 kDa band detected in  
262 the protein gel blot likely corresponds to the mature processed protein with a predicted size of  
263 52.7 kDa. This result indicates that cleavage of the endogenous GR2 signal peptide is the same  
264 for plastids and mitochondria. In *pc* lines over-expressing TK<sub>TP</sub>-GR2, a very strong increase in both  
265 bands was observed without significant change in the relative distribution between the two  
266 bands. Moreover, in all *35S<sub>pro</sub>:GR2* over-expression lines several additional protein bands with  
267 masses below that of GR2 may indicate partial degradation of GR2. Total GR activity in leaf tissue  
268 extracts was 49 nmol min<sup>-1</sup> mg<sup>-1</sup> for WT and about 700 nmol min<sup>-1</sup> mg<sup>-1</sup> for the *pc* lines (Fig. S2c).  
269 This 15-fold increase is consistent with the pronounced increase in GR2 abundance observed in  
270 the *pc* lines. All *pc* lines showed WT-like GSH and GSSG levels with no changes in the GSH/GSSG  
271 ratio detectable by HPLC-based thiol analysis (Fig. S2d). At random time points in their  
272 development several T1 plants complemented with *35S<sub>pro</sub>:TK<sub>TP</sub>-Δ<sub>1-77</sub>GR2* unexpectedly showed  
273 wilted, dwarfed and purple coloured phenotypes, ultimately resulting in plant death before seed  
274 setting (Fig. S2a). This phenotype occurred irrespective of whether the genetic background of the  
275 respective plants was WT, *gr2*<sup>+/-</sup> or *gr2*<sup>-/-</sup>. The occurrence of plant death in WT and *gr2*<sup>+/-</sup> plants  
276 strongly suggests that the phenotype was caused by co-suppression of the endogenous *GR2* gene  
277 together with the transgene.

278 To avoid potential artefacts resulting from extremely high levels of GR2 protein and also to  
279 minimize the risk of silencing, *gr2* mutants were complemented with *GR2* driven by its  
280 endogenous promoter (Fig. S1). In this case, however, only 10 % of the progeny, named *epc*, were  
281 found to be homozygous for *gr2* (Table S2). The lower frequency of the complementation with  
282 *GR2* driven by the endogenous promoter is most likely due to the much lower activity of this

283 promoter compared to the  $35S_{pro}$ . In some cases, the activity of the used  $GR2_{pro}$  may not be  
284 sufficient to achieve full complementation and thus cause premature abortion of homozygous  
285  $gr2$  embryos.

286 In contrast, none of the transgenic lines transformed with either  $35S_{pro}:SHMT_{TP-\Delta 1-77}GR2$  or  
287  $GR2_{pro}:SHMT_{TP-\Delta 1-77}GR2$  for mitochondrial targeting of GR2 was found to be a homozygous  
288 knockout for  $gr2$  (Table S2). Thus, only  $TK_{TP-\Delta 1-77}GR2$  constructs controlled by either the  
289 endogenous  $GR2_{pro}$  or  $35S_{pro}$  rescued the lethal  $gr2$  mutant, indicating that only plastid-localized  
290 GR2, but not the mitochondria-localized GR2, is essential for development. Correct targeting of  
291 both GR2 plastid complementation constructs was confirmed by immunogold labelling (Fig. 2b-  
292 d).

293 Three independent homozygous  $gr2$  mutants complemented with  $GR2_{pro}:TK_{TP-\Delta 1-77}GR2$   
294 constructs were isolated and named  $epc-1$ ,  $epc-2$ , and  $epc-3$ , respectively. When grown on soil  
295 under short day conditions, all three  $epc$  lines showed WT-like phenotypes in growth and  
296 development (Fig. 3a). GR2 protein levels in T1 plants with different genotypes with respect to  
297 the  $gr2$  locus were determined by protein gel blot analysis (Fig. 3b). Similar to WT and the  $35S_{pro}$   
298 complemented lines, protein gel blot analysis of total protein extracts consistently revealed two  
299 bands of ~110 kDa and ~53 kDa, respectively, with the 53 kDa band being much more intense. In  
300 addition to the 53 kDa and 110 kDa bands, protein extracts of  $TK_{TP-\Delta 1-77}GR2$  transformants  
301 showed a third band with a size of ~55 kDa. The appearance of this band suggests that import  
302 processing of the  $TK_{TP-\Delta 1-77}GR2$  protein differed from WT GR2. Indeed, ChloroP predicts  $TK_{TP-\Delta 1-77}GR2$   
303 processing to result in a mature protein with a mass of 54.2 kDa. In all three homozygous  
304  $gr2$  complementation lines only the 55 kDa protein was identified while the 53 kDa band was  
305 absent, further confirming at biochemical level that all three selected  $epc$  lines were indeed  $gr2$   
306 null mutants successfully complemented with  $TK_{TP-\Delta 1-77}GR2$ . Furthermore, the absence of a  
307 larger band of 61 kDa indicates that plastid import of GR2 was highly efficient without detectable  
308 traces of non-processed cytosolic protein. Protein gel blot analysis of plants transformed with  
309  $GR2_{pro}:SHMT_{TP-\Delta 1-77}GR2$  showed the same two-band pattern found in WT (Fig. 3b, lane d). Lack  
310 of additional bands suggests that the processed WT GR2 and processed  $SHMT_{TP-\Delta 1-77}GR2$   
311 proteins have similar sizes, which is also supported by bioinformatics prediction by SignalP 3.0.

312

### 313 **Minute amounts of functional GR2 are sufficient for growth**

314 GR activity of total protein extracts of the *epc* lines was  $60 \text{ nmol min}^{-1} \text{ mg}^{-1}$  and thus ~30 % lower  
315 than WT GR activity of  $90 \text{ nmol min}^{-1} \text{ mg}^{-1}$  (Fig. 3c). Both, protein gel blot analysis and GR activity  
316 measurements of all three independent *epc* lines, showed that the amount of GR2 protein was  
317 significantly lower than in WT. This indicates that either promoter and/or enhancer elements  
318 other than the 2.1 kb fragment used here, may contribute to control the GR2 expression in WT  
319 plants, or that positional effects may have led to partial repression of GR2 in *epc* lines. The  
320 content of GSH and GSSG was comparable to WT plants (Fig. 3d).

321 The GR activity in *epc* lines is due to the *GR2* transgene and the endogenous GR1 activity, which  
322 had been reported to account for 40 to 60 % of the total GR activity in leaves (Marty *et al.*, 2009;  
323 Mhamdi *et al.*, 2010). To further separate these activities and to better assess the requirement  
324 for GR2 necessary for normal growth, we generated a double heterozygous *gr1*<sup>+/-</sup> *gr2*<sup>+/-</sup> plant and  
325 complemented this with the same *GR2*<sub>pro:TK<sub>7P</sub>-Δ<sub>1-77</sub>*GR2* construct used before. From the F2  
326 progeny we selected two homozygous *gr1 gr2* double knockouts that expressed GR2 exclusively  
327 in the plastids (lines *epc-9* and *epc-27*). These *gr1 gr2* plants did not show any obvious phenotype  
328 in their growth and development during the vegetative phase under standard growth conditions  
329 (Fig. 4a). The total GR activity in leaf extracts was only between  $10 \pm 2.6$  and  $1.5 \pm 0.1 \text{ nmol mg}^{-1}$   
330  $\text{min}^{-1}$  compared to  $53.2 \pm 3.5 \text{ nmol mg}^{-1} \text{ min}^{-1}$  in WT leaves (Fig. 4b). For comparison, *gr1* mutants  
331 and the plastid-complemented *gr2* mutant (*epc-2*) showed intermediate GR-activities of  
332  $37.5 \pm 2.6$  and  $24.2 \pm 2.6 \text{ nmol mg}^{-1} \text{ min}^{-1}$ , respectively (Fig. 4b). Lack of GR1 in *gr1-1* and in *gr1*  
333 *gr2* double deletion mutants consistently resulted in an increase in total glutathione (Fig. 4c).  
334 Further analysis of the glutathione pool revealed that this increase was largely due to an increase  
335 in GSSG, which was about six-fold higher compared to WT controls (Fig. 4d). If at all, plastid-  
336 specific complementation of *gr2* resulted in only a minor increase in glutathione (Figs. 3d and 4c).  
337 To further test for mitochondrial GR activity, we first isolated mitochondria from the plastid  
338 complemented line *epc-2* and determined the specific GR activity in mitochondrial extracts.  
339 While mitochondria isolated from WT plants had a specific GR activity of  $47.9 \text{ nmol min}^{-1} \text{ mg}^{-1}$ ,  
340 mitochondria from *epc-2* contained an activity of  $2.4 \text{ nmol min}^{-1} \text{ mg}^{-1}$  (Fig. 5a). Identity of</sub>

341 mitochondrial preparations was confirmed by detection of the mitochondrial marker  
342 peroxiredoxin II F (PRXII F; (Finkemeier *et al.*, 2005)). Further analysis of the respective extracts  
343 indicated that GR2 was absent in *epc-2* mitochondria (Fig. 5c). Hybridization of the respective  
344 protein blots with a GR1 antibody (Marty *et al.*, 2009) revealed that the mitochondrial fraction  
345 also contained GR1 (Fig. 5c) which can be accounted for by the presence of peroxisomes that  
346 contain GR1, in mitochondrial preparations from Arabidopsis seedlings (Sweetlove *et al.*, 2007).  
347 No GR activity was found in mitochondria isolated from line *epc-27* (Fig. 5b). Protein gel blots  
348 confirmed absence of both GR1 and GR2 from *epc-27* mitochondria (Fig. 5d).

349

### 350 **Glutathione deficiency partially suppresses embryo lethality of *gr2***

351 Early embryonic lethality of *gr2* null mutants may be explained by lack of appropriate backup  
352 systems for GSSG reduction, or an additional, yet unknown, moonlighting function (Jeffery, 2009)  
353 of plastidic GR2. To elucidate whether the early embryonic lethal phenotype is caused solely by  
354 accumulation of GSSG in plastids, we reasoned that GSH-deficiency would necessarily go along  
355 with deficiency of GSSG and thus might suppress the early embryonic lethal phenotype of *gr2*.  
356 To test this hypothesis, *gr2* was crossed with the two GSH-deficient mutants *rml1* and *gsh1-1*,  
357 which are both compromised in the first step of GSH biosynthesis catalysed by glutamate-  
358 cysteine ligase (GSH1) and contain strongly decreased glutathione levels (Vernoux *et al.*, 2000;  
359 Cairns *et al.*, 2006). While *rml1* completes embryogenesis and germinates, the null mutant *gsh1-1*  
360 reaches U-turn stage before it dies (Vernoux *et al.*, 2000; Cairns *et al.*, 2006). While no double  
361 homozygous *rml1 gr2* could be found (Fig. S4) the *gr2 gsh1* cross and selfing of a double  
362 heterozygous plant resulted in approximately 24 % aborted seeds albeit with a distinct  
363 phenotypic variation (Fig. 6c). Closer inspection of the aborted seeds revealed that about 1/4 of  
364 seeds were aborted later than the typical *gr2* embryo, which were seen as white turgescient  
365 ovules (Fig. 6c). Indeed developing seeds collected from a selfed double heterozygous  
366 *gr2<sup>+/-</sup> gsh1<sup>+/-</sup>* plant showed a segregation of their embryos in 334 U-turn : 92 globular : 30 torpedo  
367 (12:3:1,  $\chi^2 = 0.76$ ,  $P = 0.34$ ) (Fig. 6d-g). This result indicates that GSH-deficiency caused by *gsh1*  
368 partially suppressed the early embryo-lethal *gr2* phenotype extending development until the

369 torpedo stage. This points to GSSG toxicity, as opposed to an oxidative shift in  $E_{GSH}$ , as a cause of  
370 the embryo lethality in the absence of GR2 from the plastid stroma.

371  
372 **The mitochondrial glutathione pool of plastid-complemented *gr2* mutants shows increased**  
373 **oxidation**

374 Full viability of plastid complemented *gr2* plants suggests that mitochondria can maintain their  
375 function in the absence of GR2. This suggests that they are either able to cope with a fully oxidized  
376 glutathione pool made up of GSSG, or other mechanisms of maintaining reduction exist.  
377 Candidate mechanisms include GSSG export from the matrix for reduction in the cytosol as well  
378 as an alternative enzymatic system for efficient internal GSSG reduction. To address this  
379 question, we tested whether  $E_{GSH}$  in the mitochondrial matrix of mutants lacking GR2 in  
380 mitochondria is more oxidized than in WT controls. Plastid complemented *gr2*<sup>-/-</sup> mutants (*epc-2*)  
381 were transformed with the  $E_{GSH}$  biosensor roGFP2-Grx1 targeted to the mitochondrial matrix  
382 (Albrecht *et al.*, 2014). roGFP2 constructs were expressed from  $35S_{pro}$  and we deliberately  
383 selected strongly expressing lines in which part of the sensor proteins remained in the cytosol  
384 and the nucleus (Fig. 7 and Fig. S5). The resulting dual localization of roGFP2-Grx1 allowed  
385 simultaneous ratiometric imaging of roGFP2 in both compartments by confocal microscopy.  
386 Because the roGFP2-Grx1 in the cytosol and the nucleus provides an internal control for close-  
387 to-complete sensor reduction (Meyer *et al.*, 2007; Schwarzländer *et al.*, 2008) the ratiometric  
388 images are informative without any further treatment with reducing and oxidizing compounds.  
389 While the merge of the raw images collected after excitation at 405 nm and 488 nm in WT  
390 seedlings show similar green colour in cytosol and mitochondria (Fig. 7a) the same merge for the  
391 plastid complemented *gr2*<sup>-/-</sup> mutant shows a pronounced difference: Cytosol and nucleus appear  
392 in green like in the WT control, while the mitochondria appear in yellow because the fluorescence  
393 in the 488 nm channel decreased and the fluorescence in the 405 nm channel increased (Fig. 7b).  
394 The differential behaviour of the signals in mitochondria and the cytosol is even more obvious  
395 after ratiometric analysis, which shows a partial oxidation of roGFP2-Grx1 in the GR2-deficient  
396 mitochondria. The degree of sensor oxidation can be estimated to approximately the midpoint

397 of the sensor, i.e. around 50 %. This corresponds to a pronounced shift in mitochondrial matrix  
398  $E_{\text{GSH}}$  of about 30 mV, but it remains far from a complete oxidation of the matrix glutathione pool.  
399

#### 400 **The mitochondrial ABC-transporter ATM3 has a critical function in GR2-deficient** 401 **mitochondria**

402 Export of GSSG from the mitochondrial matrix and subsequent reduction by cytosolic GR1 activity  
403 would provide an alternative mechanism to adjust the matrix  $E_{\text{GSH}}$ . To elucidate whether the GSSG  
404 export ability of ATM3 could help to maintain low GSSG levels and support the mitochondrial  
405 GR2 activity, we crossed the mutant *gr2 epc-2* deficient in mitochondrial GR2 with *atm3-4*, and  
406 isolated the double mutant. *atm3-4* is a relatively weak mutant allele, with low expression of  
407 functional *ATM3* due to a 39-nucleotide deletion in the promoter (Bernard *et al.*, 2009). The  
408 *atm3-4 gr2 epc2* double mutant showed an enhanced phenotype compared to both the *gr2 epc2*  
409 and *atm3-4* parents, with short roots at seedling stage and smaller rosettes when grown on soil  
410 (Fig. 8). Leaves appeared chlorotic and displayed a significantly lower  $F_v/F_m$  (Fig. 8d). These  
411 observations suggest synergistic action of the two mutations with lack of mitochondrial GR2  
412 causing increased GSSG levels in the matrix that cannot be efficiently decreased when ATM3  
413 protein levels are strongly depleted.

#### 414 415 **NADPH-dependent thioredoxin reductases backup mitochondrial GR2**

416 Both, NTRA and NTRB, are known to be dual-targeted to the cytosol and mitochondria (Reichheld  
417 *et al.*, 2005). Based on the observation that the NTR/TRX system efficiently reduces GSSG in the  
418 cytosol (Marty *et al.*, 2009) we hypothesized that NTRA and NTRB together with mitochondrial  
419 TRXo1 and o2 (Yoshida & Hisabori, 2016), or TRXh2 (Meng *et al.*, 2010) may provide a functional  
420 backup system for mitochondrial GR2. To further support this hypothesis, we also tested  
421 mitochondrial TRXs for their ability to reduce GSSG *in vitro* and determined steady-state kinetic  
422 parameters for GSSG for TRXh2, TRXo1 and GR2. In conjunction with NTRA recombinant TRXh2  
423 and TRXo1 are both capable of reducing GSSG, albeit with  $K_m$  values of only 2 to  $4 \times 10^3$   $\mu\text{M}$ , which  
424 is nearly 100-fold higher than the  $K_m$  of GR2 (13  $\mu\text{M}$ ) (Fig. 9). While the efficiency  $k_{\text{cat}}/K_m$  of GR2  
425 approximates the diffusion limit,  $k_{\text{cat}}/K_m$  for both TRXs is about 1000-fold lower. The GSSG

426 reduction activity of both TRXs is independent of which NTR isoform is available for TRX reduction  
427 (Fig. S6).

428 To further test the hypothesis that mitochondrial NTRs provide the rescue for lack of  
429 mitochondrial GR2, we generated a cross between an *ntra ntrb* double null mutant and a  
430 homozygous *gr2* complemented with plastid-targeted GR2 (Fig. S7). From this cross, F<sub>3</sub> plants  
431 expressing GR2 were preselected by Basta® to ensure only GR2 complemented plants to be  
432 maintained. Next, plants segregating for *ntrb* only were selected through genotyping, and selfed.  
433 71 tested F<sub>4</sub> progeny segregated for the mutant allele *ntrb* 23 *NTRB/NTRB* : 48 *NTRB/ntrb* : 0  
434 *ntrb/ntrb* ( $\chi^2 = 0.03$ ,  $P > 0.95$ ) indicating that homozygous *ntra ntrb gr2* triple mutants are not  
435 viable. The 1:2 segregation of viable plants suggested that the lethal effect of *ntra ntrb gr2* is not  
436 gametophytic but rather manifests itself only after fertilization. Consistent with this, viability  
437 staining of pollen resulted in nearly 100 % viable pollen (Fig. S8). To further confirm full viability  
438 of *ntra ntrb gr2* pollen during pollen tube growth, we backcrossed the *ntra/ntra NTRB/ntrb*  
439 *gr2/gr2 plGR2* plant to WT. This cross resulted in a 1:1 segregation for *ntrb* ( $\chi^2 = 0.7$ ,  $P = 0.34$ ;  
440 Table S3a). Similarly, the reverse cross of WT pollen to an *ntra/ntra NTRB/ntrb gr2/gr2 plGR2*  
441 triple mutant resulted in a 1:1 segregation for *ntrb* ( $\chi^2 = 0.34$ ,  $P = 0.58$ ; Table S3b). These results  
442 showed that both pollen and oocytes carrying all three mutant alleles are fully viable.

443 Developing siliques from self-fertilized *ntra/ntra NTRB/ntrb gr2/gr2 plGR2* plants in contrast  
444 contained many aborted seeds (Fig. 10a,b) supporting that the lethal phenotype was established  
445 at the diploid stage. However, the overall abortion rate of 13.4 % in siliques collected from ten  
446 randomly selected plants was significantly below the expected 25 % (114 aborted seeds out of  
447 852 seeds;  $\chi^2 = 61.35$ ,  $P \ll 0.001$ ). A closer inspection of seedlings germinated from these seeds  
448 indicated some barely viable seedlings that ceased growth about three weeks after germination  
449 and died (Fig. 10c). PCR genotyping confirmed that these seedlings were homozygous for the  
450 segregating allele *ntrb* (Fig. 10d,e).

451

452

## 453 Discussion

### 454 GR2 is indispensable in plastids



455 Appropriate detoxification of H<sub>2</sub>O<sub>2</sub> produced during normal metabolism or in response to  
456 environmental stress is mandatory to ensure maintenance of sufficiently reducing conditions for  
457 normal metabolism (Moller *et al.*, 2007; Waszczak *et al.*, 2018). The glutathione-ascorbate cycle  
458 has attained much attention and connects H<sub>2</sub>O<sub>2</sub> detoxification via ascorbate peroxidases  
459 ultimately to the local glutathione pool with GSH providing the required electrons (Foyer &  
460 Noctor, 2011). The generated GSSG is subsequently reduced back to GSH by GRs with electrons  
461 provided by NADPH. While in Arabidopsis GR1 activity in the cytosol and peroxisomes can be  
462 substituted to a sufficient extent by the cytosolic NTS to avoid lethality of null mutants (Marty *et*  
463 *al.*, 2009), *gr2* null mutants are early embryonic lethal (Bryant *et al.*, 2011). Our results  
464 unanimously show that GR2 is dual-targeted to plastids and mitochondria but is essential only in  
465 plastids.

466 A shift of  $E_{\text{GSH}}$  towards less negative values can be caused either by depletion of GSH or by  
467 increased amounts of GSSG. The GSH-deficient mutant *gsh1* completes embryogenesis up to the  
468 seed maturation phase because maternal tissues provide a minimum amount of GSH to the  
469 embryo (Cairns *et al.*, 2006; Lim *et al.*, 2014). In *rml1*, the very low GSH content results in an  $E_{\text{GSH}}$   
470 of about -260 mV (Aller *et al.*, 2013). Despite the pronounced shift in  $E_{\text{GSH}}$  the situation is not  
471 deleterious *per se*. Partial suppression of the early embryo arrest in *gr2 gsh1* double mutants  
472 rather points at the accumulation of GSSG being toxic. The severely restricted ability to build up  
473 normal GSH levels initially helps keeping the GSSG concentration low and enables embryos to  
474 develop beyond globular stage. However, the arrest at torpedo stage still occurs much earlier  
475 than the arrest in *gsh1* during seed maturation. This strongly suggests that even without normal  
476 levels of GSH, GSSG quickly accumulates to toxic levels in plastids if no GR2 is present. Plastids  
477 apparently have no backup system for GSSG reduction and no (or insufficient) ability to export  
478 GSSG to the cytosol for reduction. In developing Arabidopsis embryos, the first chloroplasts start  
479 differentiating and greening with the initiation of cotyledons at heart stage (Mansfield & Briarty,  
480 1991). Silencing of GR2 in mature plants indicates that light-dependent reduction of GSSG via  
481 plastidic TRXs may not be sufficient to maintain growth. This suggests that, in contrast to the  
482 cytosolic NTS, the plastidic FTR/TRX system cannot compensate for the lack of GR activity. This  
483 conclusion is consistent with current findings in *Physcomitrella patens* plants lacking organellar

484 GR, where stromal  $E_{\text{GSH}}$  is oxidised but not rescued by active photosynthetic electron transport  
485 (Müller-Schüssele *et al.*, 2019). Developmental arrest of *gr2* mutants at globular stage before  
486 chloroplast differentiation indicates that the accumulation of GSSG is not related to  
487 photosynthesis as a possible source of ROS (Foyer & Noctor, 2009), but rather to other basic  
488 metabolic processes. Possible processes include the formation of GSSG through reduction of  
489 oxidised GRX by GSH (Begas *et al.*, 2017) and the reduction of adenosine 5'-phosphosulfate by  
490 GSH (Bick *et al.*, 1998). In addition, several metabolic pathways in plastids involve oxidation steps  
491 in which molecular oxygen is reduced to  $\text{H}_2\text{O}_2$ . The reactions include the pyridoxal 5'-phosphate  
492 salvage pathway in which the plastidic pyridoxine/pyridoxamine 5'-phosphate oxidase produces  
493 one molecule  $\text{H}_2\text{O}_2$  (Sang *et al.*, 2011), the oxidation of L-aspartate by L-aspartate oxidase in the  
494 early steps of NAD biosynthesis (Kato *et al.*, 2006), and the three-step oxidation of  
495 protoporphyrinogen IX to protoporphyrin IX by the enzyme protoporphyrinogen oxidase PPOX  
496 (Koch *et al.*, 2004; Mochizuki *et al.*, 2010).

497 Minute amounts of GR2 activity are necessary to avoid accumulation of GSSG to toxic levels. GR,  
498 in general, has been reported to be highly active with a very low  $K_m$  for GSSG leaving only low  
499 nanomolar traces of GSSG (Veech *et al.*, 1969). This activity dominates  $E_{\text{GSH}}$  *in vivo* keeping it  
500 highly reduced as confirmed by *in vivo* imaging with roGFP-based probes (Marty *et al.*, 2009;  
501 Schwarzländer *et al.*, 2016). Accumulating GSSG may interfere with fundamental plastidic  
502 processes, such as transcription, translation and enzymatic functions. For instance, fatty acid  
503 biosynthesis is vital in developing oilseed embryos and involves the redox-regulated heteromeric  
504 plastidic acetyl-CoA-carboxylase (ACCase) (Ke *et al.*, 2000; Sasaki & Nagano, 2004; Bryant *et al.*,  
505 2011). The extraordinary importance of plastidic ACCase for embryo development is further  
506 supported by the early embryo lethal phenotype of null mutants for BCCP1 (Li *et al.*, 2011). One  
507 of four ACCase subunits, CT $\beta$  (AtCg00500, AccD), is plastid encoded. Thus, interfering with thiol  
508 switches regulating the plastidic gene expression machinery (Dietz & Pfannschmidt, 2011) or vital  
509 enzyme activities would constitute one possible scenario to account for our observations.  
510 Another possible toxic effect of GSSG is the disruption of Fe-S cluster transfer by monothiol GRXs  
511 which involves binding of GSH as a cofactor on its backbone (Moseler *et al.*, 2015). If present in  
512 high concentrations GSSG may interfere with GSH binding and disrupt Fe-S coordination (Berndt

513 *et al.*, 2007). Plastids contain two monothiol GRXs of which GRXS16 carries an additional  
514 regulatory disulfide that is responsive to GSSG (Zannini *et al.*, 2019). GSSG-mediated oxidation of  
515 GRXS16 modulates its oxidoreductase function and enables protein glutathionylation. Dissecting  
516 the mechanistic cause of embryo lethality is beyond the scope of this work, but promises  
517 intriguing novel insights into the role of redox dynamics in organelle biogenesis and early plant  
518 development.

519

### 520 **ATM3 and the mitochondrial TRX system safeguard the matrix $E_{\text{GSH}}$**

521 Direct comparison of cytosol and mitochondrial matrix in plastid complemented *gr2* mutants  
522 clearly showed that the readout of roGFP2-Grx1 was shifted to higher ratio values indicating a  
523 shift in the local  $E_{\text{GSH}}$  towards less negative values. While roGFP2 in the cytosol of plastid-  
524 complemented *gr2* lines is almost fully reduced indicating an  $E_{\text{GSH}}$  of -310 mV or even more  
525 negative, roGFP2 in the mitochondrial matrix is clearly partially oxidised. The observed degree of  
526 sensor oxidation of ~50 % would indicate an  $E_{\text{GSH}}$  of -280 mV assuming a matrix pH of 7.0 (-310  
527 mV at pH 7.5). In a solution with estimated 2 mM GSH this point would be reached with  
528 approximately 200 nM GSSG. This calculation shows that the amount of GSSG determined by  
529 HPLC in plants extracts is a significant overestimation of the amount of GSSG really present in the  
530 respective subcellular compartment. This is in line with earlier conclusions on sensor-based  
531 subcellular  $E_{\text{GSH}}$  measurements (Meyer & Dick, 2010; Schwarzländer *et al.*, 2016).

532 Although we showed that GSSG accumulation in plastids is causing embryo lethality, plants  
533 lacking GR2 in mitochondria have no obvious phenotype under control conditions. Two possible  
534 scenarios can be drawn to explain this observation: (i) GSSG can be exported to the cytosol to get  
535 reduced by GR1, or (ii) GSSG is reduced in the matrix by other enzymes. Knock-down mutants  
536 with a severely limited ATM3 capacity have been shown earlier to have a less negative  $E_{\text{GSH}}$  in the  
537 mitochondrial matrix than WT (Schaedler *et al.*, 2014). The pronounced chlorotic phenotype of  
538 *gr2 atm3-4* supports the interpretation that ATM3 export GSSG from mitochondria under  
539 physiological conditions. This mechanism may be important when NADPH is low, and GR2 activity  
540 limited. It should be noted, however, that toxic effects of GSSG in this case may also result from  
541 competition with other substrates of ATM3, such as persulfides as required for Fe-S cluster

542 biosynthesis in the cytosol. In the presence of high concentrations of GSSG and with limited  
543 transport capacity in *atm3-4* these metabolites may not be exported efficiently.  
544 Dithiol GRXs are capable of catalysing the reduction of GSSG by dihydrolipoamide (Porrás *et al.*,  
545 2002). In contrast to several non-plant species, Arabidopsis mitochondria contain only the  
546 monothiol GRXS15 which was found inactive as an oxidoreductase (Moseler *et al.*, 2015). Non-  
547 catalysed reduction of GSSG by dihydrolipoamide would be extremely inefficient and unlikely to  
548 contribute efficiently to GSSG removal. In contrast, the GSSG reduction activity of NTRs together  
549 with mitochondrial TRXs appears high enough to reduce significant amounts of GSSG. Lethality  
550 of *gr2 epc-2 ntra ntrb* shows that the situation in the mitochondrial matrix resembles the NTS-  
551 based backup of cytosolic GR1 (Marty *et al.*, 2009). The presence of multiple backup systems may  
552 explain why the lethal effect becomes apparent only after germination. In contrast to *gr2* plastids  
553 where direct detection of glutathionylated proteins, protein disulfides and further thiol  
554 modifications is not possible due to the minute amount of material in early embryos, proteomic  
555 studies in mitochondria lacking GR2 seem feasible. In the future, such measurements may reveal  
556 novel metabolic bottlenecks generated from oxidative modification of protein thiols and  
557 resulting imbalances in thiol switching.

558  
559

## 560 **Acknowledgements**

561 This work was supported by the Deutsche Forschungsgemeinschaft (DFG) through a project grant  
562 (ME1567/3-2), the Emmy-Noether programme (SCHW1719/1-1), the priority program SPP1710  
563 'Dynamics of thiol-based redox switches in cellular physiology' (ME1567/9-1, SCHW1719/7-1, HE  
564 1848/16-1, WI3560/2-1) and a DAAD-Procope exchange grant to AJM and JPR. SAKB was  
565 supported through a grant from the HEC Pakistan. Selected aspects of the work in the lab of  
566 RH/MW was supported by the DFG within the collaborative research center 1036, TP13. This  
567 study is set within the framework of the "Laboratoires d'Excellences (LABEX)" TULIP (ANR-10-  
568 LABX-41) and was supported in part by the Centre National de la Recherche Scientifique and by  
569 the Agence Nationale de la Recherche ANR-Blanc Cynthiol 12-BSV6-0011.

570

571

572 **Author contributions**

573 AJM, RH and JPR designed research; LM, DB, CM, SAKB, AM, MS, BZ, CR, and MW performed  
574 research; JB contributed plant lines; LM, DB, CM, MS, SJMS, JPR and AJM analyzed data and  
575 SJMS, MS and AJM wrote the manuscript with assistance from all co-authors.

576

577

578 **ORCID**

579 Andreas J. Meyer <https://orcid.org/0000-0001-8144-4364>

580 Stefanie J. Müller-Schüssele <https://orcid.org/0000-0003-4061-1175>

581 Markus Schwarzländer <https://orcid.org/0000-0003-0796-8308>

582 Anna Moseler <https://orcid.org/0000-0003-4641-8093>

583 Markus Wirtz <https://orcid.org/0000-0001-7790-4022>

584 Rüdiger Hell <https://orcid.org/0000-0002-6238-4818>

585 Sajid Ali Khan Bangash: <https://orcid.org/0000-0002-6936-8060>

586 Janneke Balk <https://orcid.org/0000-0003-4738-1990>

587

## 588 References

589

- 590 **Albrecht SC, Sobotta MC, Bausewein D, Aller I, Hell R, Dick TP, Meyer AJ. 2014.** Redesign of  
591 genetically encoded biosensors for monitoring mitochondrial redox status in a broad  
592 range of model eukaryotes. *Journal of Biomolecular Screening* **19**(3): 379-386.
- 593 **Alexander MP. 1969.** Differential staining of aborted and nonaborted pollen. *Stain Technology*  
594 **44**(3): 117-122.
- 595 **Aller I, Rouhier N, Meyer AJ. 2013.** Development of roGFP2-derived redox probes for  
596 measurement of the glutathione redox potential in the cytosol of severely glutathione-  
597 deficient *rml1* seedlings. *Frontiers in Plant Science* **4**: 506.
- 598 **Alonso JM, Stepanova AN, Leisse TJ, Kim CJ, Chen H, Shinn P, Stevenson DK, Zimmerman J,**  
599 **Barajas P, Cheuk R, et al. 2003.** Genome-wide insertional mutagenesis of *Arabidopsis*  
600 *thaliana*. *Science* **301**(5633): 653-657.
- 601 **Asada K. 1999.** The water-water cycle in chloroplasts: scavenging of active oxygens and  
602 dissipation of excess photons. *Annual Review of Plant Physiology and Plant Molecular*  
603 *Biology* **50**: 601-639.
- 604 **Attacha S, Solbach D, Bela K, Moseler A, Wagner S, Schwarzländer M, Aller I, Müller SJ, Meyer**  
605 **AJ. 2017.** Glutathione peroxidase-like enzymes cover five distinct cell compartments and  
606 membrane surfaces in *Arabidopsis thaliana*. *Plant, Cell and Environment* **40**(8): 1281-  
607 1295.
- 608 **Begas P, Liedgens L, Moseler A, Meyer AJ, Deponte M. 2017.** Glutaredoxin catalysis requires  
609 two distinct glutathione interaction sites. *Nature Communications* **8**: 14835.
- 610 **Bendtsen JD, Nielsen H, von Heijne G, Brunak S. 2004.** Improved prediction of signal peptides:  
611 SignalP 3.0. *Journal of Molecular Biology* **340**(4): 783-795.
- 612 **Bernard DG, Cheng Y, Zhao Y, Balk J. 2009.** An allelic mutant series of ATM3 reveals its key role  
613 in the biogenesis of cytosolic iron-sulfur proteins in *Arabidopsis*. *Plant Physiology* **151**(2):  
614 590-602.
- 615 **Berndt C, Hudemann C, Hanschmann E, Axelsson R, Holmgren A, Lillig C. 2007.** How does iron-  
616 sulfur cluster coordination regulate the activity of human glutaredoxin 2? *Antioxidants*  
617 *& Redox Signaling* **9**(1): 151-157.
- 618 **Bick JA, Aslund F, Chen Y, Leustek T. 1998.** Glutaredoxin function for the carboxyl-terminal  
619 domain of the plant-type 5'-adenylylsulfate reductase. *Proceedings of the National*  
620 *Academy of Sciences, USA* **95**(14): 8404-8409.
- 621 **Bryant N, Lloyd J, Sweeney C, Myouga F, Meinke D. 2011.** Identification of nuclear genes  
622 encoding chloroplast-localized proteins required for embryo development in  
623 *Arabidopsis*. *Plant Physiology* **155**(4): 1678-1689.

- 624 **Buchanan BB, Balmer Y. 2005.** Redox regulation: a broadening horizon. *Annual Review of Plant*  
625 *Biology* **56**: 187-220.
- 626 **Cairns NG, Pasternak M, Wachter A, Cobbett CS, Meyer AJ. 2006.** Maturation of Arabidopsis  
627 seeds is dependent on glutathione biosynthesis within the embryo. *Plant Physiology*  
628 **141**(2): 446-455.
- 629 **Chew O, Whelan J, Millar AH. 2003.** Molecular definition of the ascorbate-glutathione cycle in  
630 Arabidopsis mitochondria reveals dual targeting of antioxidant defenses in plants.  
631 *Journal of Biological Chemistry* **278**(47): 46869-46877.
- 632 **Creissen G, Reynolds H, Xue Y, Mullineaux P. 1995.** Simultaneous targeting of pea glutathione  
633 reductase and of a bacterial fusion protein to chloroplasts and mitochondria in  
634 transgenic tobacco. *The Plant Journal* **8**(2): 167-175.
- 635 **Delorme-Hinoux V, Bangash SAK, Meyer AJ, Reichheld JP. 2016.** Nuclear thiol redox systems in  
636 plants. *Plant Science* **243**: 84-95.
- 637 **Dietz K-J, Pfannschmidt T. 2011.** Novel regulators in photosynthetic redox control of plant  
638 metabolism and gene expression. *Plant Physiology* **155**(4): 1477-1485.
- 639 **Edwards K, Johnstone C, Thompson C. 1991.** A simple and rapid method for the preparation of  
640 plant genomic DNA for PCR analysis. *Nucleic Acids Research* **19**(6): 1349.
- 641 **Fahey RC. 2001.** Novel thiols of prokaryotes. *Annual Review of Microbiology* **55**(1): 333-356.
- 642 **Finkemeier I, Goodman M, Lamkemeyer P, Kandlbinder A, Sweetlove LJ, Dietz K-J. 2005.** The  
643 mitochondrial type II peroxiredoxin F is essential for redox homeostasis and root growth  
644 of *Arabidopsis thaliana* under stress. *Journal of Biological Chemistry* **280**(13): 12168-  
645 12180.
- 646 **Foyer CH, Noctor G. 2009.** Redox regulation in photosynthetic organisms: signaling,  
647 acclimation, and practical implications. *Antioxidants & Redox Signaling* **11**(4): 861-905.
- 648 **Foyer CH, Noctor G. 2011.** Ascorbate and glutathione: the heart of the redox hub. *Plant*  
649 *Physiology* **155**(1): 2-18.
- 650 **Fricke MD. 2016.** Quantitative redox imaging software. *Antioxidants & Redox Signaling* **24**(13):  
651 752-762.
- 652 **Gilroy S, Białasek M, Suzuki N, Górecka M, Devireddy AR, Karpiński S, Mittler R. 2016.** ROS,  
653 calcium, and electric signals: key mediators of rapid systemic signaling in plants. *Plant*  
654 *Physiology* **171**(3): 1606-1615.
- 655 **Höfgen R, Willmitzer L. 1990.** Biochemical and genetic analysis of different patatin isoforms  
656 expressed in various organs of potato (*Solanum tuberosum* L.). *Plant Science* **99**: 221-  
657 230.
- 658 **Ito J, Heazlewood JL, Millar AH. 2006.** Analysis of the soluble ATP-binding proteome of plant  
659 mitochondria identifies new proteins and nucleotide triphosphate interactions within  
660 the matrix. *Journal of Proteome Research* **5**(12): 3459-3469.
- 661 **Jeffery C. 2009.** Moonlighting proteins--an update. *Molecular BioSystems* **5**(4): 345-350.

- 662 **Katoh A, Uenohara K, Akita M, Hashimoto T. 2006.** Early steps in the biosynthesis of NAD in  
663 Arabidopsis start with aspartate and occur in the plastid. *Plant Physiology* **141**(3): 851-  
664 857.
- 665 **Ke J, Behal RH, Back SL, Nikolau BJ, Wurtele ES, Oliver DJ. 2000.** The role of pyruvate  
666 dehydrogenase and acetyl-coenzyme A synthetase in fatty acid synthesis in developing  
667 arabidopsis seeds. *Plant Physiology* **123**(2): 497-508.
- 668 **Kispal G, Csere P, Prohl C, Lill R. 1999.** The mitochondrial proteins Atm1p and Nfs1p are  
669 essential for biogenesis of cytosolic Fe/S proteins. *The EMBO Journal* **18**(14): 3981-3989.
- 670 **Koch M, Breithaupt C, Kiefersauer R, Freigang J, Huber R, Messerschmidt A. 2004.** Crystal  
671 structure of protoporphyrinogen IX oxidase: a key enzyme in haem and chlorophyll  
672 biosynthesis. *The EMBO Journal* **23**(8): 1720-1728.
- 673 **Leighton J, Schatz G. 1995.** An ABC transporter in the mitochondrial inner membrane is  
674 required for normal growth of yeast. *The EMBO Journal* **14**(1): 188-195.
- 675 **Li X, Ilarslan H, Brachova L, Qian HR, Li L, Che P, Wurtele ES, Nikolau BJ. 2011.** Reverse-genetic  
676 analysis of the two biotin-containing subunit genes of the heteromeric acetyl-coenzyme  
677 A carboxylase in Arabidopsis indicates a unidirectional functional redundancy. *Plant*  
678 *Physiology* **155**(1): 293-314.
- 679 **Lim B, Pasternak M, Meyer AJ, Cobbett CS. 2014.** Restricting glutamylcysteine synthetase  
680 activity to the cytosol or glutathione biosynthesis to the plastid is sufficient for normal  
681 plant development and stress tolerance. *Plant Biology* **16**(1): 58-67.
- 682 **Lutziger I, Oliver DJ. 2001.** Characterization of two cDNAs encoding mitochondrial lipoamide  
683 dehydrogenase from Arabidopsis. *Plant Physiology* **127**(2): 615-623.
- 684 **Mansfield SG, Briarty LG. 1991.** Early embryogenesis in *Arabidopsis thaliana*. II. The developing  
685 embryo. *Canadian Journal of Botany* **69**(3): 461-476.
- 686 **Marchal C, Delorme-Hinoux V, Bariat L, Siala W, Belin C, Saez-Vasquez J, Riondet C, Reichheld**  
687 **JP. 2014.** NTR/NRX define a new thioredoxin system in the nucleus of *Arabidopsis*  
688 *thaliana* cells. *Molecular Plant* **7**(1): 30-44.
- 689 **Marty L, Siala W, Schwarzländer M, Fricker MD, Wirtz M, Sweetlove LJ, Meyer Y, Meyer AJ,**  
690 **Reichheld J-P, Hell R. 2009.** The NADPH-dependent thioredoxin system constitutes a  
691 functional backup for cytosolic glutathione reductase in Arabidopsis. *Proceedings of the*  
692 *National Academy of Sciences, USA* **106**(22): 9109-9114.
- 693 **Maughan SC, Pasternak M, Cairns N, Kiddle G, Brach T, Jarvis R, Haas F, Nieuwland J, Lim B,**  
694 **Müller C, et al. 2010.** Plant homologs of the *Plasmodium falciparum* chloroquine-  
695 resistance transporter, PfCRT, are required for glutathione homeostasis and stress  
696 responses. *Proceedings of the National Academy of Sciences, USA* **107**(5): 2331-2336.
- 697 **Meng L, Wong JH, Feldman LJ, Lemaux PG, Buchanan BB. 2010.** A membrane-associated  
698 thioredoxin required for plant growth moves from cell to cell, suggestive of a role in  
699 intercellular communication. *Proceedings of the National Academy of Sciences, USA*  
700 **107**(8): 3900-3905.



- 701 **Meyer A, Dick T. 2010.** Fluorescent protein-based redox probes. *Antioxidants & Redox Signaling*  
702 **13(5):** 621-650.
- 703 **Meyer AJ. 2008.** The integration of glutathione homeostasis and redox signaling. *Journal of*  
704 *Plant Physiology* **165(13):** 1390-1403.
- 705 **Meyer AJ, Brach T, Marty L, Kreye S, Rouhier N, Jacquot J-P, Hell R. 2007.** Redox-sensitive GFP  
706 in *Arabidopsis thaliana* is a quantitative biosensor for the redox potential of the cellular  
707 glutathione redox buffer. *The Plant Journal* **52(5):** 973-986.
- 708 **Meyer AJ, Fricker MD. 2000.** Direct measurement of glutathione in epidermal cells of intact  
709 Arabidopsis roots by two-photon laser scanning microscopy. *Journal of Microscopy*  
710 **198(3):** 174-181.
- 711 **Meyer AJ, May MJ, Fricker M. 2001.** Quantitative *in vivo* measurement of glutathione in  
712 Arabidopsis cells. *The Plant Journal* **27(1):** 67-78.
- 713 **Mhamdi A, Hager J, Chaouch S, Queval G, Han Y, Taconnat L, Saindrenan P, Gouia H, Issakidis-**  
714 **Bourguet E, Renou J-P, et al. 2010.** Arabidopsis GLUTATHIONE REDUCTASE1 plays a  
715 crucial role in leaf responses to intracellular hydrogen peroxide and in ensuring  
716 appropriate gene expression through both salicylic acid and jasmonic acid signaling  
717 pathways. *Plant Physiology* **153(3):** 1144-1160.
- 718 **Michalska J, Zauber H, Buchanan BB, Cejudo FJ, Geigenberger P. 2009.** NTRC links built-in  
719 thioredoxin to light and sucrose in regulating starch synthesis in chloroplasts and  
720 amyloplasts. *Proceedings of the National Academy of Sciences, USA* **106(24):** 9908-9913.
- 721 **Mittler R, Vanderauwera S, Gollery M, Van Breusegem F. 2004.** Reactive oxygen gene network  
722 of plants. *Trends in Plant Science* **9(10):** 490-498.
- 723 **Mochizuki N, Tanaka R, Grimm B, Masuda T, Moulin M, Smith AG, Tanaka A, Terry MJ. 2010.**  
724 The cell biology of tetrapyrroles: a life and death struggle. *Trends in Plant Science* **15(9):**  
725 488-498.
- 726 **Moller IM. 2001.** Plant mitochondria and oxidative stress: Electron transport, NADPH turnover,  
727 and metabolism of reactive oxygen species. *Annual Review of Plant Physiology and Plant*  
728 *Molecular Biology* **52(1):** 561-591.
- 729 **Moller IM, Jensen PE, Hansson A. 2007.** Oxidative modifications to cellular components in  
730 plants. *Annual Review of Plant Biology* **58(1):** 459-481.
- 731 **Morgan B, Ezerina D, Amoako TN, Riemer J, Seedorf M, Dick TP. 2013.** Multiple glutathione  
732 disulfide removal pathways mediate cytosolic redox homeostasis. *Nature Chemical*  
733 *Biology* **9(2):** 119-125.
- 734 **Moseler A, Aller I, Wagner S, Nietzel T, Przybyla-Toscano J, Mühlenhoff U, Lill R, Berndt C,**  
735 **Rouhier N, Schwarzländer M, et al. 2015.** The mitochondrial monothiol glutaredoxin  
736 S15 is essential for iron-sulfur protein maturation in *Arabidopsis thaliana*. *Proceedings of*  
737 *the National Academy of Science, USA* **112(44):** 13735-13740.

- 738 **Müller-Schüssele SJ, Wang R, Gütle DD, Romer J, Rodriguez-Franco M, Scholz M, Lüth VM,**  
739 **Kopriva S, Dörmann P, Schwarzländer M, et al. 2019.** Chloroplasts require glutathione  
740 reductase to balance reactive oxygen species and maintain efficient photosynthesis.  
741 *bioRxiv*: <https://doi.org/10.1101/588442>
- 742 **Navrot N, Collin V, Gualberto J, Gelhaye E, Hirasawa M, Rey P, Knaff DB, Issakidis E, Jacquot J-**  
743 **P, Rouhier N. 2006.** Plant glutathione peroxidases are functional peroxiredoxins  
744 distributed in several subcellular compartments and regulated during biotic and abiotic  
745 stresses. *Plant Physiology* **142**(4): 1364-1379.
- 746 **Pasternak M, Lim B, Wirtz M, Hell R, Cobbett CS, Meyer AJ. 2008.** Restricting glutathione  
747 biosynthesis to the cytosol is sufficient for normal plant development. *The Plant Journal*  
748 **53**(6): 999-1012.
- 749 **Peltier J-B, Cai Y, Sun Q, Zabrouskov V, Giacomelli L, Rudella A, Ytterberg AJ, Rutschow H, van**  
750 **Wijk KJ. 2006.** The oligomeric stromal proteome of *Arabidopsis thaliana* chloroplasts.  
751 *Molecular and Cellular Proteomics* **5**(1): 114-133.
- 752 **Perez-Ruiz JM, Naranjo B, Ojeda V, Guinea M, Cejudo FJ. 2017.** NTRC-dependent redox  
753 balance of 2-Cys peroxiredoxins is needed for optimal function of the photosynthetic  
754 apparatus. *Proceedings of the National Academy of Sciences, USA* **114**(45): 12069-  
755 12074.
- 756 **Porras P, Pedrajas J, Martinez-Galisteo E, Padilla C, Johansson C, Holmgren A, Barcena J. 2002.**  
757 Glutaredoxins catalyze the reduction of glutathione by dihydrolipoamide with high  
758 efficiency. *Biochemical and Biophysical Research Communications* **295**(5): 1046-1051.
- 759 **Reichheld J-P, Khafif M, Riondet C, Droux M, Bonnard G, Meyer Y. 2007.** Inactivation of  
760 thioredoxin reductases reveals a complex interplay between thioredoxin and  
761 glutathione pathways in *Arabidopsis* development. *Plant Cell* **19**(6): 1851-1865.
- 762 **Reichheld J, Meyer E, Khafif M, Bonnard G, Meyer Y. 2005.** AtNTRB is the major mitochondrial  
763 thioredoxin reductase in *Arabidopsis thaliana*. *FEBS Letters* **579**(2): 337-342.
- 764 **Reumann S, Babujee L, Ma C, Wienkoop S, Siemsen T, Antonicelli GE, Rasche N, Luder F,**  
765 **Weckwerth W, Jahn O. 2007.** Proteome analysis of *Arabidopsis* leaf peroxisomes reveals  
766 novel targeting peptides, metabolic pathways, and defense mechanisms. *Plant Cell*  
767 **19**(10): 3170-3193.
- 768 **Sambrook J, Fritsch EF, Maniatis T. 1989.** *Molecular cloning: a laboratory manual*. New York:  
769 Cold Spring Harbour Laboratory Press.
- 770 **Sang Y, Locy RD, Goertzen LR, Rashotte AM, Si Y, Kang K, Singh NK. 2011.** Expression, in vivo  
771 localization and phylogenetic analysis of a pyridoxine 5'-phosphate oxidase in  
772 *Arabidopsis thaliana*. *Plant Physiology and Biochemistry* **49**(1): 88-95.
- 773 **Sasaki Y, Nagano Y. 2004.** Plant acetyl-CoA carboxylase: structure, biosynthesis, regulation, and  
774 gene manipulation for plant breeding. *Bioscience, Biotechnology and Biochemistry* **68**(6):  
775 1175-1184.

- 776 **Schaedler TA, Thornton JD, Kruse I, Schwarzländer M, Meyer AJ, van Veen HW, Balk J. 2014.** A  
777 conserved mitochondrial ATP-binding cassette transporter exports glutathione  
778 polysulfide for cytosolic metal cofactor assembly. *Journal of Biological Chemistry*  
779 **289**(34): 23264-23274.
- 780 **Schwarzländer M, Dick TP, Meyer AJ, Morgan B. 2016.** Dissecting redox biology using  
781 fluorescent protein sensors. *Antioxidants & Redox Signaling* **24**(13): 680-712.
- 782 **Schwarzländer M, Fricker M, Müller C, Marty L, Brach T, Novak T, Sweetlove L, Hell R, Meyer**  
783 **A. 2008.** Confocal imaging of glutathione redox potential in living plant cells. *Journal of*  
784 *Microscopy* **231**(2): 299-316.
- 785 **Serrato AJ, Perez-Ruiz JM, Spinola MC, Cejudo FJ. 2004.** A novel NADPH thioredoxin reductase,  
786 localized in the chloroplast, which deficiency causes hypersensitivity to abiotic stress in  
787 *Arabidopsis thaliana*. *Journal of Biological Chemistry* **279**(42): 43821-43827.
- 788 **Srinivasan V, Pierik AJ, Lill R. 2014.** Crystal structures of nucleotide-free and glutathione-bound  
789 mitochondrial ABC transporter Atm1. *Science* **343**(6175): 1137-1140.
- 790 **Sweetlove L, Taylor N, Leaver C. 2007.** Isolation of intact, functional mitochondria from the  
791 model plant *Arabidopsis thaliana*. *Methods in Molecular Biology* **372**: 125-136.
- 792 **Tzafrir I, Pena-Muralla R, Dickerman A, Berg M, Rogers R, Hutchens S, Sweeney TC, McElver J,**  
793 **Aux G, Patton D, et al. 2004.** Identification of genes required for embryo development  
794 in *Arabidopsis*. *Plant Physiology* **135**(3): 1206-1220.
- 795 **Veech RL, Eggleston LV, Krebs HA. 1969.** The redox state of free nicotinamide-adenine  
796 dinucleotide phosphate in the cytoplasm of rat liver. *Biochemical Journal* **115**(4): 609-  
797 619.
- 798 **Vernoux T, Wilson RC, Seeley KA, Reichheld JP, Muroy S, Brown S, Maughan SC, Cobbett CS,**  
799 **Van Montagu M, Inze D, et al. 2000.** The ROOT MERISTEMLESS1/CADMIUM SENSITIVE2  
800 gene defines a glutathione-dependent pathway involved in initiation and maintenance  
801 of cell division during postembryonic root development. *Plant Cell* **12**(1): 97-110.
- 802 **Waszczak C, Carmody M, Kangasjarvi J. 2018.** Reactive oxygen species in plant signaling.  
803 *Annual Review of Plant Biology* **69**: 209-236.
- 804 **Wirtz M, Hell R. 2003.** Production of cysteine for bacterial and plant biotechnology: Application  
805 of cysteine feedback-insensitive isoforms of serine acetyltransferase. *Amino Acids* **24**:  
806 195-203.
- 807 **Xu L, Carrie C, Law SR, Murcha MW, Whelan J. 2013.** Acquisition, conservation, and loss of  
808 dual-targeted proteins in land plants. *Plant Physiology* **161**(2): 644-662.
- 809 **Yoshida K, Hisabori T. 2016.** Adenine nucleotide-dependent and redox-independent control of  
810 mitochondrial malate dehydrogenase activity in *Arabidopsis thaliana*. *Biochimica et*  
811 *Biophysica Acta (BBA) - Bioenergetics* **1857**(6): 810-818.
- 812 **Yu X, Pasternak T, Eiblmeier M, Ditengou F, Kochersperger P, Sun J, Wang H, Rennenberg H,**  
813 **Teale W, Paponov I, et al. 2013.** Plastid-localized glutathione reductase2-regulated

814 glutathione redox status is essential for Arabidopsis root apical meristem maintenance.  
815 *Plant Cell* **25**(11): 4451-4468.

816 **Zannini F, Moseler A, Bchini R, Dhalleine T, Meyer AJ, Rouhier N, Couturier J. 2019.** The  
817 thioredoxin-mediated recycling of *Arabidopsis thaliana* GRXS16 relies on a conserved C-  
818 terminal cysteine. *Biochimica et Biophysica Acta (BBA) - General Subjects* **1863**(2): 426-  
819 436.

820  
821

## 822 **Supporting Information**

823 **Fig. S1** Schematic representation of constructs used to confirm signal peptide functionality and  
824 for compartment-specific complementation of *gr2* mutants.

825 **Fig. S2** Characterization of transgenic Arabidopsis lines over-expressing plastid-targeted GR2.

826 **Fig. S3** Protein gel blot analysis of GR1 and GR2 in mitochondrial preparations of WT and  
827 plastid-complemented *gr2 (epc-2)*.

828 **Fig. S4** Characterization of *gr2 rml1* double mutants.

829 **Fig. S5** High expression of SHMT<sub>TP</sub>-roGFP2-Grx1 results in incomplete mitochondrial targeting.

830 **Fig. S6** Mitochondrial thioredoxins reduce GSSG *in vitro* with electrons provided by NTRA and  
831 NTRB with similar efficiencies.

832 **Fig. S7** Crossing scheme for generation of *gr2 ntra ntrb*.

833 **Fig. S8** Viability stain of pollen from *ntra<sup>-/-</sup> gr2<sup>-/-</sup> NTRB/ntrb pIGR2* plants.

834 **Table S1** Oligonucleotides used in this study.

835 **Table S2** Genetic complementation of the *gr2* mutant with compartment-specific GR2  
836 constructs.

837 **Table S3** Reciprocal cross between *ntra/ntra NTRB/ntrb gr2/gr2 pIGR2* and WT.

838 **Methods S1** Antibody production and gel blot analysis.

839 **Methods S2** Immunogold labelling and electron microscopy

840

## 841 **Figure legends**

842 **Fig. 1** Isolation and phenotypic characterization of *gr2* null mutants. (a) Exon/intron structure of  
843 the Arabidopsis *GR2* gene (At3g54660). Exons are represented by large arrows and the triangles  
844 show the T-DNA insertions for three *emb2360* alleles  
845 ([http://seedgenes.org/SeedGeneProfile\\_geneSymbol\\_EMB\\_2360.html](http://seedgenes.org/SeedGeneProfile_geneSymbol_EMB_2360.html)) and the allele *gr2-1*.  
846 Primer binding sites for genotyping of *gr2-1* are indicated by black arrows. (b) Genotype analysis  
847 of different *gr2-1* lines. Upper panel: PCR performed with *GR2* gene specific primers. Lower  
848 panel: PCR with a gene-specific primer and a primer for the left T-DNA border. Lane a: DNA  
849 marker: size is indicated in kb; Lane b: WT; Lanes c-e: heterozygous *gr2-1* mutants. (c) Embryo-  
850 lethal phenotype associated with *gr2-1*. Immature siliques from self-fertilized WT (upper panel)  
851 and heterozygous *gr2-1* mutants (lower panel) were opened to observe segregation of seed  
852 phenotypes. Bar, 500  $\mu\text{m}$ . 25 % of the seeds in the *gr2* silique show a lethal phenotype visible as  
853 white seeds. (d-e) Developing seeds of heterozygous *gr2-1* mutants were cleared using Hoyer's  
854 solution and analysed by bright field microscopy (d) and DIC microscopy (e). Arrows indicate  
855 white ovules containing embryos arrested at globular stage. Bars, 50  $\mu\text{m}$ .

856  
857 **Fig. 2** Immunogold localization of GR2 in plastid complemented *gr2* deletion lines. Fixed and  
858 dissected mature leaves were probed with a primary antibody raised against Arabidopsis GR2. C:  
859 chloroplast; M: mitochondrion; Px: peroxisome; V: vacuole; N: nucleus; St: starch grain. Bars,  
860 1  $\mu\text{m}$ . (a) WT. (b) Line *pc-2* ('plastid complemented') with  $\text{TK}_{\text{TP}}\text{-}\Delta_{1-77}\text{GR2}$  expressed from the 35S  
861 promoter. (c) Line *epc-2* with  $\text{TK}_{\text{TP}}\text{-}\Delta_{1-77}\text{GR2}$  expressed from the endogenous GR2 promoter. (d)  
862 Quantitative analysis of gold particles observed in electron microscopy micrographs. Values are  
863 means  $\pm$  SE and document the amount of gold particles per  $\mu\text{m}^2$  in the respective organelle. Data  
864 were analysed by the Kruskal-Wallis test, followed by post hoc comparison according to Conover.  
865 Different lowercase letters indicate significant differences ( $P < 0.05$ ).  $n > 60$ . nd = not detected.

866  
867 **Fig. 3** Characterization of lines expressing plastid-targeted GR2 controlled by its endogenous  
868 promoter. (a) Growth phenotypes of WT (a) and three independent homozygous *gr2* deletion  
869 mutants complemented with  $\text{GR2}_{\text{pro}}\text{:TK}_{\text{TP}}\text{-}\Delta_{1-77}\text{GR2}$ : *epc-1* (b), *epc-2* (c), *epc-3* (d). All transgenic

870 plants were from the Basta<sup>®</sup>-selected T1 generation. (b) Protein gel blot analysis of transgenic  
871 Basta<sup>®</sup>-selected T1 lines transformed with complementation constructs driven by the  
872 endogenous *GR2* promoter and targeted to either mitochondria or plastids. Loading was as  
873 follows: a: Pre-stained molecular mass standard, b: WT, c: WT transformed with *GR2<sub>pro</sub>:SHMT<sub>TP</sub>-*  
874 *Δ<sub>1-77</sub>GR2*, d: *gr2<sup>+/-</sup>* transformed with *SHMT<sub>TP</sub>-Δ<sub>1-77</sub>GR2*, e: WT transformed with *GR2<sub>pro</sub>:TK<sub>TP</sub>-Δ<sub>1-</sub>*  
875 *77GR2*, f: *gr2<sup>+/-</sup>* transformed with *GR2<sub>pro</sub>:TK<sub>TP</sub>-Δ<sub>1-77</sub>GR2*, g-i: three independent homozygous *gr2*  
876 deletion lines transformed with *GR2<sub>pro</sub>:TK<sub>TP</sub>-Δ<sub>1-77</sub>GR2* (*epc-1*, *epc-2* and *epc-3*). Arrows indicate  
877 protein bands with the size of 110 kDa (black), 55 kDa (dark grey) and 53 kDa (light grey). (c) GR  
878 activity in total protein extract from leaves. Proteins were extracted from WT and T2 plants of  
879 the homozygous *gr2* lines *epc-1*, *epc-2* and *epc-3*. Means ± SD of three independent plants of  
880 each line are shown. (d) Contents of oxidized and reduced glutathione. After extraction of leaf  
881 tissue of 5-week-old plants reduced glutathione (GSH) and glutathione disulfide (GSSG) were  
882 determined by HPLC. Means ± SD of 6 independent plants of each line are shown.

883

884 **Fig. 4** Glutathione reductase activity and low molecular weight thiols of *gr1 gr2* double  
885 homozygous mutants complemented with plastid-targeted GR2. (a) Rosette phenotypes of plants  
886 grown on soil for six weeks under short day conditions (8 h : 16 h, light : dark). Bar, 1 cm. (b) GR  
887 activity in total protein extracts from leaves. Proteins were extracted from WT, *gr1*, plastid  
888 complemented *gr2* (*epc-2*) and two *gr1 gr2* double mutants (*epc-9* and *epc-27*) that were  
889 complemented with *GR2<sub>pro</sub>:TK<sub>TP</sub>-Δ<sub>1-77</sub>GR2*. Means ± SD of three independent plants of each  
890 complemented line are shown. (c) Low-molecular weight thiols analysed by HPLC from leaf  
891 extracts. GSH in this case refers to total glutathione. Means ± SD, *n* = 3. (d) Reduced glutathione  
892 (GSH) and glutathione disulfide (GSSG) determined by HPLC in leaf extracts. Means ± SD, *n* = 3.

893

894 **Fig. 5** Glutathione reductase activity in isolated mitochondria. Intact mitochondria were isolated  
895 from two-week old hydroponically grown Arabidopsis plants (WT and *epc-2* lacking endogenous  
896 GR2, or *epc-27* lacking both endogenous GRs, respectively). Activities represent the means from  
897 four independent preparations with six technical replicates. Error bars represent SD. (a, b) GR  
898 activity. n.d. = not detected; \* indicates  $P < 5 \cdot 10^{-4}$ . (c, d) Protein gel blots of PRXII F, GR2 and GR1

899 in mitochondrial preparations. Loading controls were stained with amido black. In addition to  
900 GR1 (54 kDa), the GR1 antibody detected also a smaller protein of about 50 kDa (Fig. 5d). This  
901 band, however, appears to result from a side activity against another mitochondrial protein that  
902 is detectable in concentrated isolated mitochondria, but not in whole leaf extracts (Fig. S3b).  
903 Mitochondria contain two lipoamide dehydrogenases (MTLPD1 and MTLPD2) that are closely  
904 related to GR and are both predicted with a molecular mass of 49.9 kDa after cleavage of the  
905 mitochondrial target peptide (Lutziger & Oliver, 2001). Thus, it is likely that the additional band  
906 results from a cross reaction of the antibody with MTLPDs.

907

908 **Fig. 6** Characterization of *gr2 gsh1* double mutants. (a) WT silique at 14 d after fertilization (DAF).  
909 (b) Silique of self-fertilized heterozygous *gr2* plant displaying 25 % aborted seeds. (c) Silique of  
910 self-fertilized double heterozygous *gr2<sup>+/-</sup> gsh1<sup>+/-</sup>* plant displaying segregation of green WT seeds,  
911 partially bleached *gsh1* seeds (▲), brownish early aborted *gr2* seeds (\*), and transparent seeds  
912 (⊗) that remain fully turgescient significantly longer than *gr2* seeds. (d-g) DIC images of ovules  
913 developed in a silique of a self-fertilized double heterozygous *gr2<sup>+/-</sup> gsh1<sup>+/-</sup>* plant 14 DAF. Bars, 50  
914 μm.

915

916 **Fig. 7** Simultaneous imaging of the local glutathione redox status in mitochondria and the cytosol.  
917 The ratiometric redox probe roGFP2-Grx1 was expressed with a SHMT<sub>TP</sub> mitochondrial targeting  
918 sequence driven by a *35S<sub>pro</sub>*. After transformation lines with residual roGFP2-Grx1 in the cytosol  
919 were selected and used for simultaneous redox imaging in mitochondria and the cytosol. Images  
920 show hypocotyl cells in WT seedlings (a) or plastid complemented *gr2<sup>-/-</sup>* seedlings (b). Images  
921 taken after excitation at 405 nm are false colour coded in red and images taken after excitation  
922 at 488 nm are coded in green in order to visualize a pronounced colour change in the merge  
923 image from green to yellow in the mitochondria. Bars, 10 μm.

924

925 **Fig. 8** *atm3-4 gr2 epc2* double mutants show a semi-dwarf and chlorotic phenotype. (a) 8-d-old  
926 seedlings of the double mutant compared to WT and single mutants. Bar, 0.5 cm. (b) Root length  
927 of the mutants compared to WT. Plants were grown on ½ MS medium containing 0.5 % sucrose

928 and 0.8 % phytigel for 5-8 days under long-day conditions after stratification for 2 d (means  $\pm$   
929 SD,  $n = 5-12$ ). (c) Plants were grown under long-day conditions for four weeks. (d) Chlorophyll  
930 fluorescence of 4-week-old plants grown on soil under long-day conditions (means  $\pm$  SD,  $n = 7$ ).  
931 The statistical analysis (one way ANOVA with post hoc Holm-Sidak comparisons for WT vs.  
932 mutant) indicates significant changes; \* $P \leq 0.05$ ; \*\*\* $P \leq 0.001$ .

933  
934 **Fig. 9** Mitochondrial TRXs in conjunction with NTRA can reduce GSSG *in vitro*. (a) Activity is  
935 monitored as NADPH oxidation. Enzymes and substrates were used at the following  
936 concentrations: NADPH, 250  $\mu$ M; GSSG, 1 mM; GR2, 0.01  $\mu$ M; TRXh2 and TRXo1, 2  $\mu$ M; NTRA, 1  
937  $\mu$ M; Means  $\pm$  SD ( $n = 3$ ). Note that the amount of disulfide reductase protein varied between the  
938 assays. (b) Steady-state kinetic parameters of GR2 and TRX-dependent GSSG reduction systems.

939  
940 **Fig. 10** Characterization of *ntra ntrb gr2* triple mutants expressing plastid-targeted GR2 under  
941 control of its endogenous promoter. (a) WT silique 20 d after fertilization. (b) Silique from a plant  
942 homozygous for both *ntra* and *gr2*, complemented with *pGR2* and heterozygous for *ntrb*. (c)  
943 Phenotype of mutant seedlings 18 d after germination. (d, e) Genotyping of seedlings shown in  
944 panel c for *NTRB* (d) and the *ntrb* T-DNA insertion (e).

945

946



947 **Figure 1**

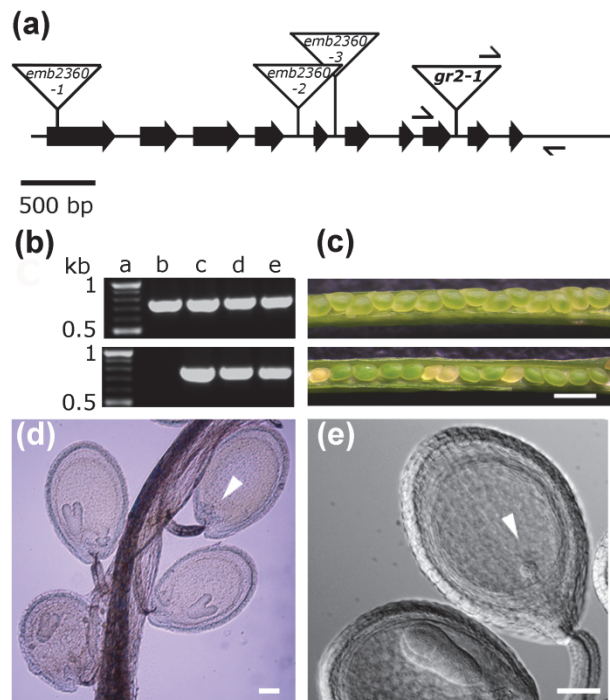

948  
949

950 **Fig. 1** Isolation and phenotypic characterization of *gr2* null mutants. (a) Exon/intron structure of  
951 the Arabidopsis *GR2* gene (At3g54660). Exons are represented by large arrows and the triangles  
952 show the T-DNA insertions for three *emb2360* alleles  
953 ([http://seedgenes.org/SeedGeneProfile\\_geneSymbol\\_EMB\\_2360.html](http://seedgenes.org/SeedGeneProfile_geneSymbol_EMB_2360.html)) and the allele *gr2-1*.  
954 Primer binding sites for genotyping of *gr2-1* are indicated by black arrows. (b) Genotype analysis  
955 of different *gr2-1* lines. Upper panel: PCR performed with *GR2* gene specific primers. Lower  
956 panel: PCR with a gene-specific primer and a primer for the left T-DNA border. Lane a: DNA  
957 marker: size is indicated in kb; Lane b: WT; Lanes c-e: heterozygous *gr2-1* mutants. (c) Embryo-  
958 lethal phenotype associated with *gr2-1*. Immature siliques from self-fertilized WT (upper panel)  
959 and heterozygous *gr2-1* mutants (lower panel) were opened to observe segregation of seed  
960 phenotypes. Bar, 500 µm. 25 % of the seeds in the *gr2* silique show a lethal phenotype visible as  
961 white seeds. (d-e) Developing seeds of heterozygous *gr2-1* mutants were cleared using Hoyer's  
962 solution and analysed by bright field microscopy (d) and DIC microscopy (e). Arrows indicate  
963 white ovules containing embryos arrested at globular stage. Bars, 50 µm.

964 **Figure 2**

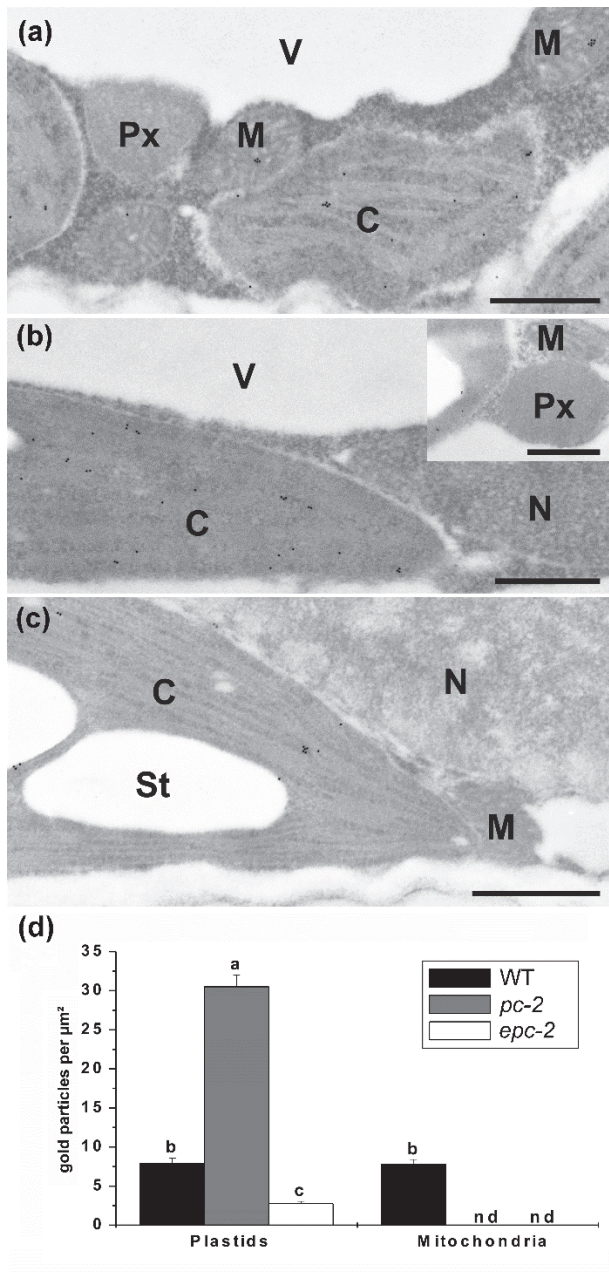

965

966 **Fig. 2** Immunogold localization of GR2 in plastid complemented *gr2* deletion lines. Fixed and  
967 dissected mature leaves were probed with a primary antibody raised against Arabidopsis GR2. C:  
968 chloroplast; M: mitochondrion; Px: peroxisome; V: vacuole; N: nucleus; St: starch grain. Bars,  
969 1  $\mu\text{m}$ . (a) WT. (b) Line *pc-2* ('plastid complemented') with  $\text{TK}_{\text{TP}}\text{-}\Delta_{1-77}\text{GR2}$  expressed from the 35S  
970 promoter. (c) Line *epc-2* with  $\text{TK}_{\text{TP}}\text{-}\Delta_{1-77}\text{GR2}$  expressed from the endogenous GR2 promoter. (d)  
971 Quantitative analysis of gold particles observed in electron microscopy micrographs. Values are  
972 means  $\pm$  SE and document the amount of gold particles per  $\mu\text{m}^2$  in the respective organelle. Data  
973 were analysed by the Kruskal-Wallis test, followed by post hoc comparison according to Conover.  
974 Different lowercase letters indicate significant differences ( $P < 0.05$ ).  $n > 60$ . nd = not detected.

975 **Figure 3**

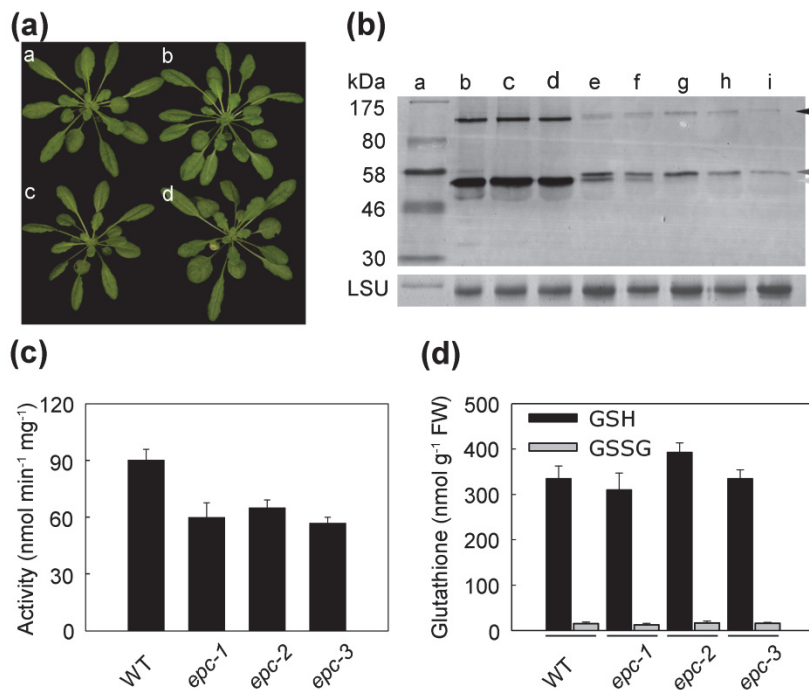

976  
977

978 **Fig. 3** Characterization of lines expressing plastid-targeted GR2 controlled by its endogenous  
979 promoter. (a) Growth phenotypes of WT (a) and three independent homozygous *gr2* deletion  
980 mutants complemented with *GR2<sub>pro</sub>:TK<sub>TP</sub>-Δ<sub>1-77</sub>GR2*: *epc-1* (b), *epc-2* (c), *epc-3* (d). All transgenic  
981 plants were from the Basta<sup>®</sup>-selected T1 generation. (b) Protein gel blot analysis of transgenic  
982 Basta<sup>®</sup>-selected T1 lines transformed with complementation constructs driven by the  
983 endogenous *GR2* promoter and targeted to either mitochondria or plastids. Loading was as  
984 follows: a: Pre-stained molecular mass standard, b: WT, c: WT transformed with *GR2<sub>pro</sub>:SHMT<sub>TP</sub>-*  
985 *Δ<sub>1-77</sub>GR2*, d: *gr2<sup>+/-</sup>* transformed with *SHMT<sub>TP</sub>-Δ<sub>1-77</sub>GR2*, e: WT transformed with *GR2<sub>pro</sub>:TK<sub>TP</sub>-*  
986 *Δ<sub>1-77</sub>GR2*, f: *gr2<sup>+/-</sup>* transformed with *GR2<sub>pro</sub>:TK<sub>TP</sub>-Δ<sub>1-77</sub>GR2*, g-i: three independent homozygous *gr2*  
987 deletion lines transformed with *GR2<sub>pro</sub>:TK<sub>TP</sub>-Δ<sub>1-77</sub>GR2* (*epc-1*, *epc-2* and *epc-3*). Arrows indicate  
988 protein bands with the size of 110 kDa (black), 55 kDa (dark grey) and 53 kDa (light grey). (c) GR  
989 activity in total protein extract from leaves. Proteins were extracted from WT and T2 plants of  
990 the homozygous *gr2* lines *epc-1*, *epc-2* and *epc-3*. Means ± SD of three independent plants of  
991 each line are shown. (d) Contents of oxidized and reduced glutathione. After extraction of leaf  
992 tissue of 5-week-old plants reduced glutathione (GSH) and glutathione disulfide (GSSG) were  
993 determined by HPLC. Means ± SD of 6 independent plants of each line are shown.

994 **Figure 4**

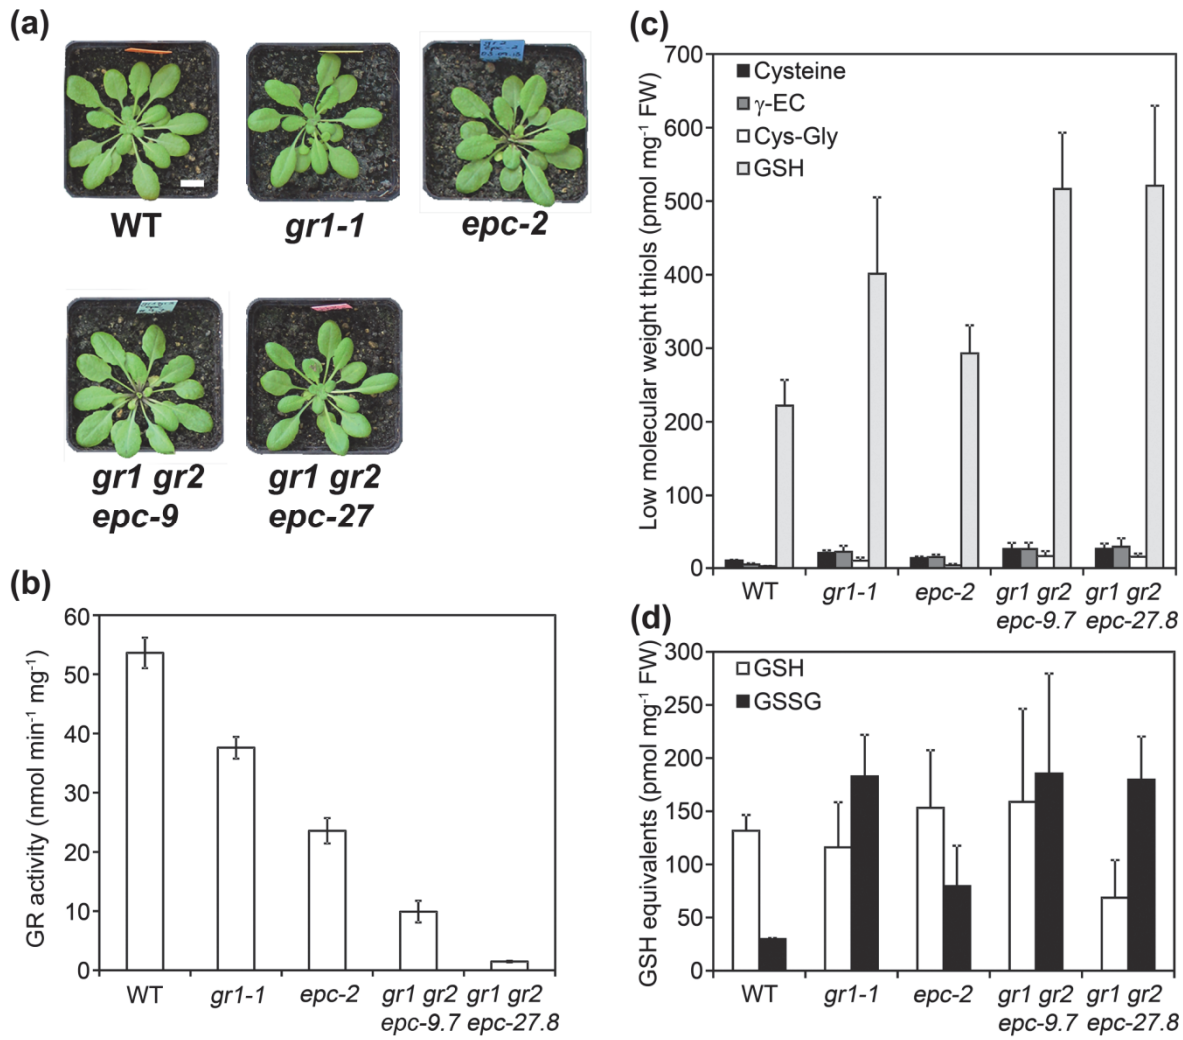

995  
996

997 **Fig. 4** Glutathione reductase activity and low molecular weight thiols of *gr1 gr2* double  
998 homozygous mutants complemented with plastid-targeted GR2. (a) Rosette phenotypes of plants  
999 grown on soil for six weeks under short day conditions (8 h : 16 h, light : dark). Bar, 1 cm. (b) GR  
1000 activity in total protein extracts from leaves. Proteins were extracted from WT, *gr1*, plastid  
1001 complemented *gr2* (*epc-2*) and two *gr1 gr2* double mutants (*epc-9* and *epc-27*) that were  
1002 complemented with *GR2<sub>pro:TKTP-Δ1-77</sub>*GR2. Means ± SD of three independent plants of each  
1003 complemented line are shown. (c) Low-molecular weight thiols analysed by HPLC from leaf  
1004 extracts. GSH in this case refers to total glutathione. Means ± SD, *n* = 3. (d) Reduced glutathione  
1005 (GSH) and glutathione disulfide (GSSG) determined by HPLC in leaf extracts. Means ± SD, *n* = 3.  
1006

1007 **Figure 5**

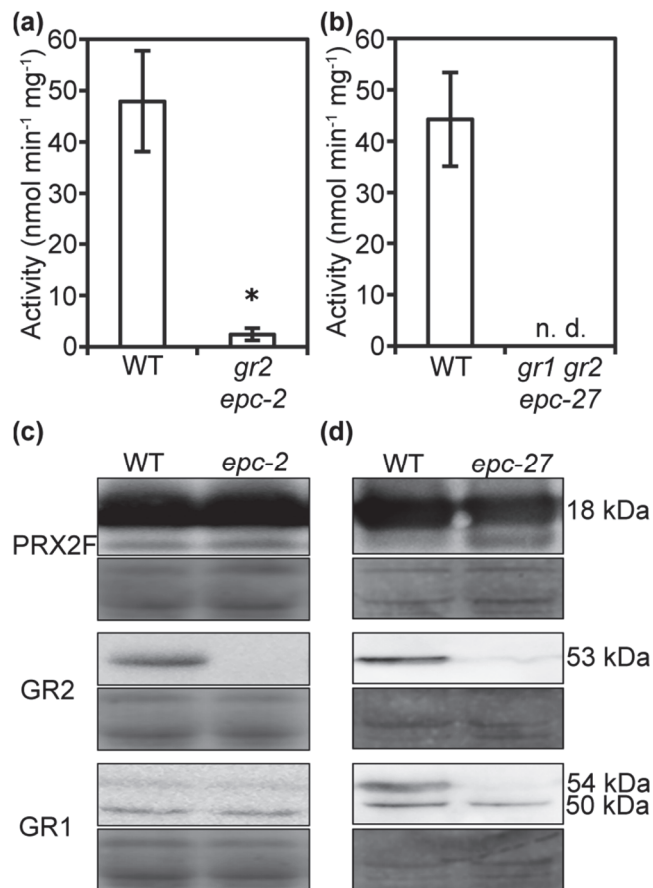

1008

1009 **Fig. 5** Glutathione reductase activity in isolated mitochondria. Intact mitochondria were  
1010 isolated from two-week old hydroponically grown *Arabidopsis* plants (WT and *epc-2* lacking  
1011 endogenous GR2, or *epc-27* lacking both endogenous GRs, respectively). Activities represent  
1012 the means from four independent preparations with six technical replicates. Error bars  
1013 represent SD. (a, b) GR activity. n.d. = not detected; \* indicates  $P < 5 \times 10^{-4}$ . (c, d) Protein gel  
1014 blots of PRXII F, GR2 and GR1 in mitochondrial preparations. Loading controls were stained with  
1015 amido black. In addition to GR1 (54 kDa), the GR1 antibody detected also a smaller protein of  
1016 about 50 kDa (Fig. 5d). This band, however, appears to result from a side activity against  
1017 another mitochondrial protein that is detectable in concentrated isolated mitochondria, but not  
1018 in whole leaf extracts (Fig. S3b). Mitochondria contain two lipoamide dehydrogenases (MTLPD1  
1019 and MTLPD2) that are closely related to GR and are both predicted with a molecular mass of  
1020 49.9 kDa after cleavage of the mitochondrial target peptide (Lutziger & Oliver, 2001). Thus, it is  
1021 likely that the additional band results from a cross reaction of the antibody with MTLPDs.

1022 **Figure 6**

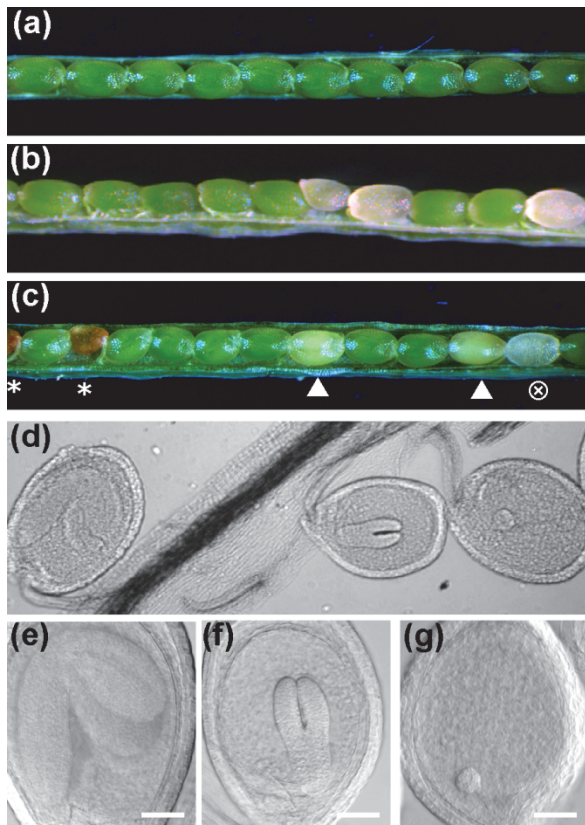

1023

1024 **Fig. 6** Characterization of *gr2 gsh1* double mutants. (a) WT silique at 14 d after fertilization (DAF).

1025 (b) Silique of self-fertilized heterozygous *gr2* plant displaying 25 % aborted seeds. (c) Silique of

1026 self-fertilized double heterozygous *gr2*<sup>+/-</sup> *gsh1*<sup>+/-</sup> plant displaying segregation of green WT seeds,

1027 partially bleached *gsh1* seeds (▲), brownish early aborted *gr2* seeds (\*), and transparent seeds

1028 (⊗) that remain fully turgescient significantly longer than *gr2* seeds. (d-g) DIC images of ovules

1029 developed in a silique of a self-fertilized double heterozygous *gr2*<sup>+/-</sup> *gsh1*<sup>+/-</sup> plant 14 DAF. Bars, 50

1030 μm.

1031

1032 **Figure 7**

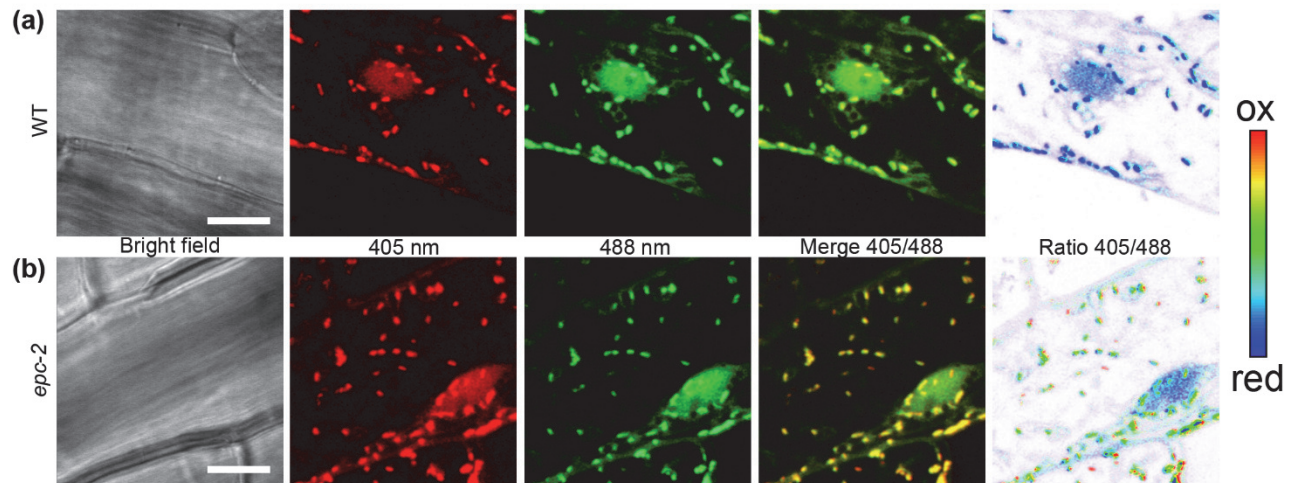

1033

1034 **Fig. 7** Simultaneous imaging of the local glutathione redox status in mitochondria and the cytosol.  
1035 The ratiometric redox probe roGFP2-Grx1 was expressed with a SHMT<sub>TP</sub> mitochondrial targeting  
1036 sequence driven by a *35S<sub>pro</sub>*. After transformation lines with residual roGFP2-Grx1 in the cytosol  
1037 were selected and used for simultaneous redox imaging in mitochondria and the cytosol. Images  
1038 show hypocotyl cells in WT seedlings (a) or plastid complemented *gr2*<sup>-/-</sup> seedlings (b). Images  
1039 taken after excitation at 405 nm are false colour coded in red and images taken after excitation  
1040 at 488 nm are coded in green in order to visualize a pronounced colour change in the merge  
1041 image from green to yellow in the mitochondria. Bars, 10 μm.

1042

1043 **Figure 8**

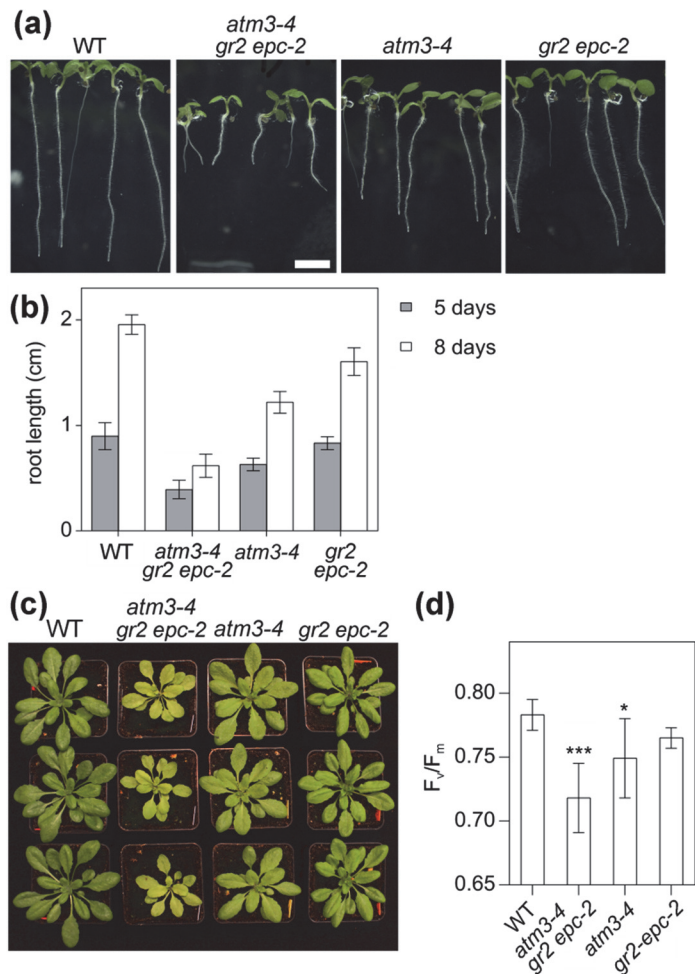

1044

1045 **Fig. 8** *atm3-4 gr2 epc2* double mutants show a semi-dwarf and chlorotic phenotype. (a) 8-d-old  
1046 seedlings of the double mutant compared to WT and single mutants. Bar, 0.5 cm. (b) Root length  
1047 of the mutants compared to WT. Plants were grown on ½ MS medium containing 0.5 % sucrose  
1048 and 0.8 % phytagel for 5-8 days under long-day conditions after stratification for 2 d (means ±  
1049 SD,  $n = 5-12$ ). (c) Plants were grown under long-day conditions for four weeks. (d) Chlorophyll  
1050 fluorescence of 4-week-old plants grown on soil under long-day conditions (means ± SD,  $n = 7$ ).  
1051 The statistical analysis (one way ANOVA with post hoc Holm-Sidak comparisons for WT vs.  
1052 mutant) indicates significant changes; \* $P \leq 0.05$ ; \*\*\* $P \leq 0.001$ .

1053



1054 **Figure 9**

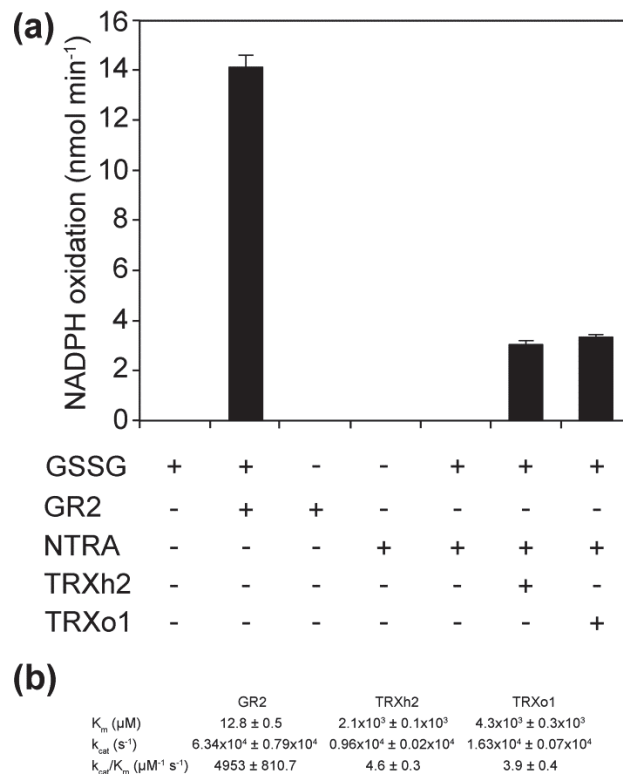

1055

1056 **Fig. 9** Mitochondrial TRXs in conjunction with NTRA can reduce GSSG *in vitro*. (a) Activity is  
 1057 monitored as NADPH oxidation. Enzymes and substrates were used at the following  
 1058 concentrations: NADPH, 250  $\mu\text{M}$ ; GSSG, 1 mM; GR2, 0.01  $\mu\text{M}$ ; TRXh2 and TRXo1, 2  $\mu\text{M}$ ; NTRA, 1  
 1059  $\mu\text{M}$ ; Means  $\pm$  SD ( $n = 3$ ). Note that the amount of disulfide reductase protein varied between the  
 1060 assays. (b) Steady-state kinetic parameters of GR2 and TRX-dependent GSSG reduction systems.

1061 **Figure 10**

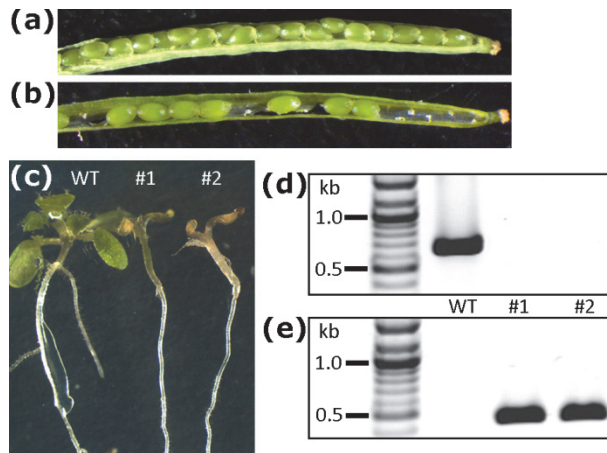

1062

1063 **Fig. 10** Characterization of *ntra ntrb gr2* triple mutants expressing plastid-targeted GR2 under  
1064 control of its endogenous promoter. (a) WT silique 20 d after fertilization. (b) Silique from a plant  
1065 homozygous for both *ntra* and *gr2*, complemented with *pIGR2* and heterozygous for *ntrb*. (c)  
1066 Phenotype of mutant seedlings 18 d after germination. (d, e) Genotyping of seedlings shown in  
1067 panel c for *NTRB* (d) and the *ntrb* T-DNA insertion (e).  
1068
